# Supplementary material for: The Mosquito Larvicidal Activity of Lignans from Branches of Cinnamomum camphora chvar. Borneol
Source: MDPI journal article supplement (doi:10.3390/molecules28093769), 2023-04-27
Supplement: s1 [file s1]

# The Mosquito Larvicidal Activity of Lignans from Branches of *Cinnamomum camphora* chvar. Borneol

Zhiyong Xu <sup>1,†</sup>, Junhui Chen <sup>2,†</sup>, Ruifeng Shang <sup>3</sup>, Fan Yang <sup>4</sup>, Chuanqi Xie <sup>1</sup>, Yunfei Liu <sup>1</sup>, Xuefang Wen <sup>1</sup>, Jianping Fu <sup>1</sup>, Wei Xiong <sup>1,\*</sup> and Lei Wu <sup>1,\*</sup>

<sup>1</sup> Institute of Applied Chemistry, Jiangxi Academy of Sciences, Nanchang 330096, China; xuzhiyong@jxas.ac.cn (Z.X.)

<sup>2</sup> Institute of Microbiology, Jiangxi Academy of Sciences, Nanchang 330096, China; allenchen0426@gmail.com (J.C.)

<sup>3</sup> School of Pharmaceutical Sciences, Jiangxi University of Chinese Medicine, Nanchang 330096, China

<sup>4</sup> College of Food Sciences and Engineering, Jiangxi Agricultural University, Nanchang 330096, China

\* Correspondence: xiongwei@jxas.ac.cn (W.X.); wulei@jxas.ac.cn (L.W.); Tel.: +86-0791-8813-1372 (L.W.)

† These authors contributed equally to this work.

**Abstract:** The chemical investigation of branches of *Cinnamomum camphora* chvar. Borneol guided by mosquito larvicidal activity led to the isolation of fourteen known lignans (**1–14**). Their structures were elucidated unambiguously based on comprehensive spectroscopic analysis and comparison with the literature data. This is the first report of these compounds being isolated from branches of *Cinnamomum camphora* chvar. Borneol. Compounds **3–5** and **8–14** were isolated from this plant for the first time. All compounds isolated were subjected to anti-inflammatory, mosquito larvicidal activity and cytotoxic activity evaluation. Compounds (**1–14**) showed significant mosquito larvicidal activity against *Culex pipiens quinquefasciatus* with lethal mortality in 50% (LC<sub>50</sub>), with values ranging from 0.009 to 0.24 µg/mL. Among them, furofuran lignans(**1–8**) exhibited potent mosquito larvicidal activity against *Cx. p. quinquefasciatus*, with LC<sub>50</sub> values of 0.009–0.021 µg/mL. From the perspective of a structure–activity relationship, compounds with a dioxolane group showed high mosquito larvicidal activity and have potential to be developed into a mosquitocide.

**Keywords:** *Cinnamomum camphora* chvar. Borneol; lignans; mosquito control; structure–activity relationship

Figure S1. <sup>1</sup>H NMR (400 MHz, CDCl<sub>3</sub>) spectrum of **1**-----4

Figure S2. <sup>13</sup>C NMR (100 MHz, CDCl<sub>3</sub>) spectrum of **1**-----4

Figure S3. ESI-MS spectrum of **1**-----5

Figure S4. <sup>1</sup>H NMR (400 MHz, CDCl<sub>3</sub>) spectrum of **2**-----5

Figure S5. <sup>13</sup>C NMR (100 MHz, CDCl<sub>3</sub>) spectrum of **2**-----6

|                                                                                                                            |    |
|----------------------------------------------------------------------------------------------------------------------------|----|
| Figure S6. ESI-MS spectrum of <b>2</b> -----                                                                               | 6  |
| Figure S7. <sup>1</sup> H NMR (400 MHz, CDCl <sub>3</sub> ) spectrum of <b>3</b> -----                                     | 7  |
| Figure S8. <sup>13</sup> C NMR (100 MHz, CDCl <sub>3</sub> ) spectrum of <b>3</b> -----                                    | 7  |
| Figure S9. HRESI-MS spectrum of <b>3</b> -----                                                                             | 8  |
| Figure S10. <sup>1</sup> H NMR (400 MHz, DMSO- <i>d</i> <sub>6</sub> ) spectrum of <b>4</b> -----                          | 8  |
| Figure S11. <sup>13</sup> C NMR (100 MHz, DMSO- <i>d</i> <sub>6</sub> ) spectrum of <b>4</b> -----                         | 9  |
| Figure S12. ESI-MS spectrum of <b>4</b> -----                                                                              | 9  |
| Figure S13. <sup>1</sup> H NMR (400 MHz, DMSO- <i>d</i> <sub>6</sub> ) spectrum of <b>5</b> -----                          | 10 |
| Figure S14. <sup>13</sup> C NMR (100 MHz, DMSO- <i>d</i> <sub>6</sub> ) spectrum of <b>5</b> -----                         | 10 |
| Figure S15. ESI-MS spectrum of <b>5</b> -----                                                                              | 11 |
| Figure S16. <sup>1</sup> H NMR (400 MHz, DMSO- <i>d</i> <sub>6</sub> ) spectrum of <b>6</b> -----                          | 11 |
| Figure S17. <sup>13</sup> C NMR (100 MHz, DMSO- <i>d</i> <sub>6</sub> ) spectrum of <b>6</b> -----                         | 12 |
| Figure S18. HRESI-MS spectrum of <b>6</b> -----                                                                            | 12 |
| Figure S19. <sup>1</sup> H NMR (400 MHz, DMSO- <i>d</i> <sub>6</sub> ) spectrum of <b>7</b> -----                          | 13 |
| Figure S20. <sup>13</sup> C NMR (100 MHz, DMSO- <i>d</i> <sub>6</sub> ) spectrum of <b>7</b> -----                         | 13 |
| Figure S21. ESI-MS spectrum of <b>7</b> -----                                                                              | 14 |
| Figure S22. <sup>1</sup> H NMR (400 MHz, DMSO- <i>d</i> <sub>6</sub> ) spectrum of <b>8</b> -----                          | 14 |
| Figure S23. <sup>13</sup> C NMR (100 MHz, DMSO- <i>d</i> <sub>6</sub> ) spectrum of <b>8</b> -----                         | 15 |
| Figure S24. HRESI-MS spectrum of <b>8</b> -----                                                                            | 15 |
| Figure S25. <sup>1</sup> H NMR (400 MHz, DMSO- <i>d</i> <sub>6</sub> ) spectrum of <b>9</b> -----                          | 16 |
| Figure S26. <sup>13</sup> C NMR (100 MHz, DMSO- <i>d</i> <sub>6</sub> ) spectrum of <b>9</b> -----                         | 16 |
| Figure S27. HRESI-MS spectrum of <b>9</b> -----                                                                            | 17 |
| Figure S28. <sup>1</sup> H NMR (400 MHz, DMSO- <i>d</i> <sub>6</sub> ) spectrum of <b>10</b> -----                         | 17 |
| Figure S29. <sup>13</sup> C NMR (100 MHz, DMSO- <i>d</i> <sub>6</sub> ) spectrum of <b>10</b> -----                        | 18 |
| Figure S30. HRESI-MS spectrum of <b>10</b> -----                                                                           | 18 |
| Figure S31. <sup>1</sup> H NMR (400 MHz, DMSO- <i>d</i> <sub>6</sub> ) spectrum of <b>11</b> -----                         | 19 |
| Figure S32. <sup>13</sup> C NMR (100 MHz, DMSO- <i>d</i> <sub>6</sub> ) spectrum of <b>11</b> -----                        | 19 |
| Figure S33. HRESI-MS spectrum of <b>11</b> -----                                                                           | 20 |
| Figure S34. <sup>1</sup> H NMR (400 MHz, DMSO- <i>d</i> <sub>6</sub> ) spectrum of <b>12</b> -----                         | 20 |
| Figure S35. <sup>13</sup> C NMR (100 MHz, DMSO- <i>d</i> <sub>6</sub> ) spectrum of <b>12</b> -----                        | 21 |
| Figure S36. HRESI-MS spectrum of <b>12</b> -----                                                                           | 21 |
| Figure S37. <sup>1</sup> H NMR (400 MHz, DMSO- <i>d</i> <sub>6</sub> ) spectrum of <b>13</b> -----                         | 22 |
| Figure S38. <sup>13</sup> C NMR (100 MHz, DMSO- <i>d</i> <sub>6</sub> ) spectrum of <b>13</b> -----                        | 22 |
| Figure S39. HRESI-MS spectrum of <b>13</b> -----                                                                           | 23 |
| Figure S40. <sup>1</sup> H NMR (400 MHz, DMSO- <i>d</i> <sub>6</sub> ) spectrum of <b>14</b> -----                         | 23 |
| Figure S41. <sup>13</sup> C NMR (100 MHz, DMSO- <i>d</i> <sub>6</sub> ) spectrum of <b>14</b> -----                        | 24 |
| Figure S42. HRESI-MS spectrum of <b>14</b> -----                                                                           | 24 |
| Table S1-14. Comparison of <sup>1</sup> H and <sup>13</sup> C data between compounds <b>1-14</b> and those in literature-- | 25 |

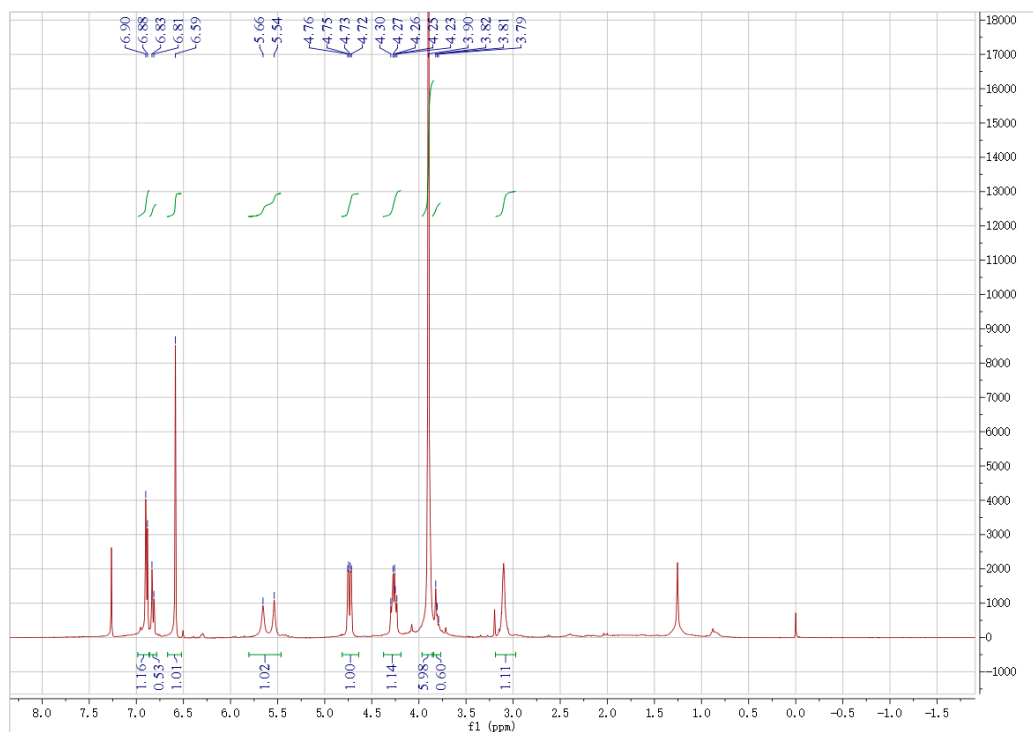

Figure S1. <sup>1</sup>H NMR (400 MHz, CDCl<sub>3</sub>) spectrum of **1**

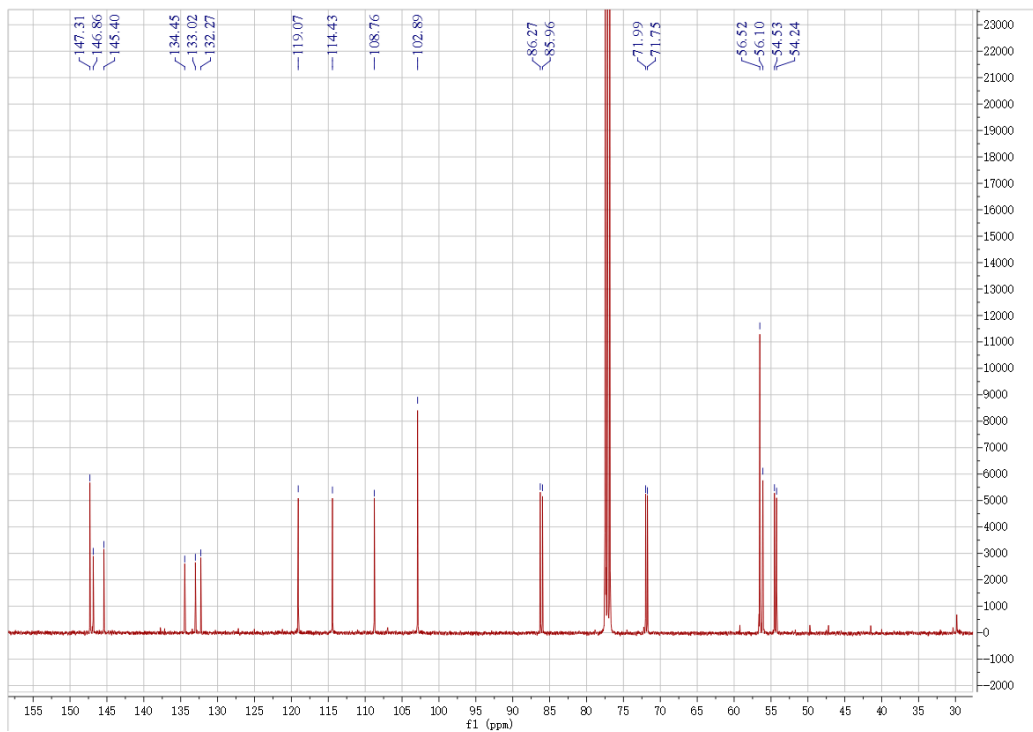

Figure S2. <sup>13</sup>C NMR (100 MHz, CDCl<sub>3</sub>) spectrum of **1**

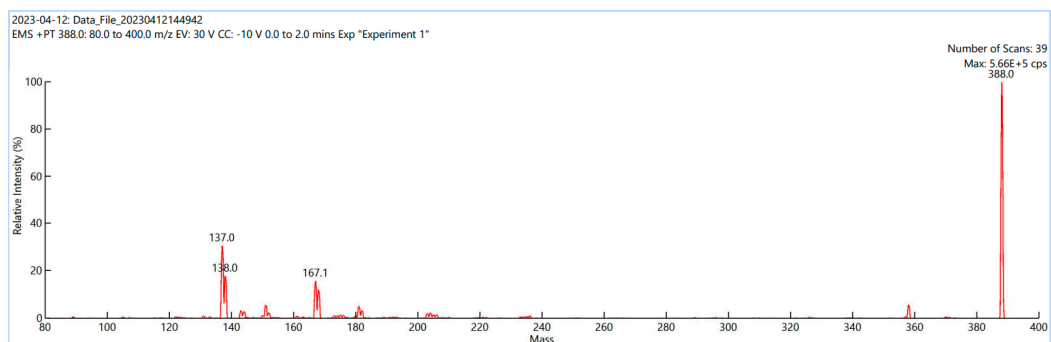

Figure S3. ESI-MS spectrum of **1**

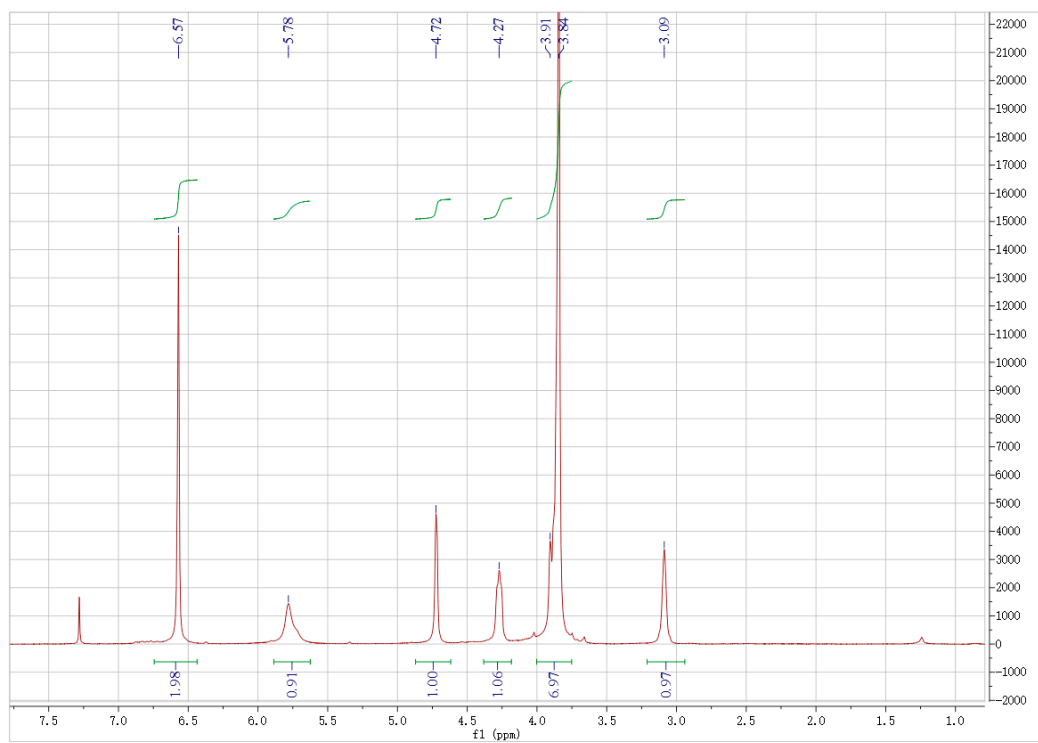

Figure S4.  $^1\text{H}$  NMR (400 MHz,  $\text{CDCl}_3$ ) spectrum of **2**

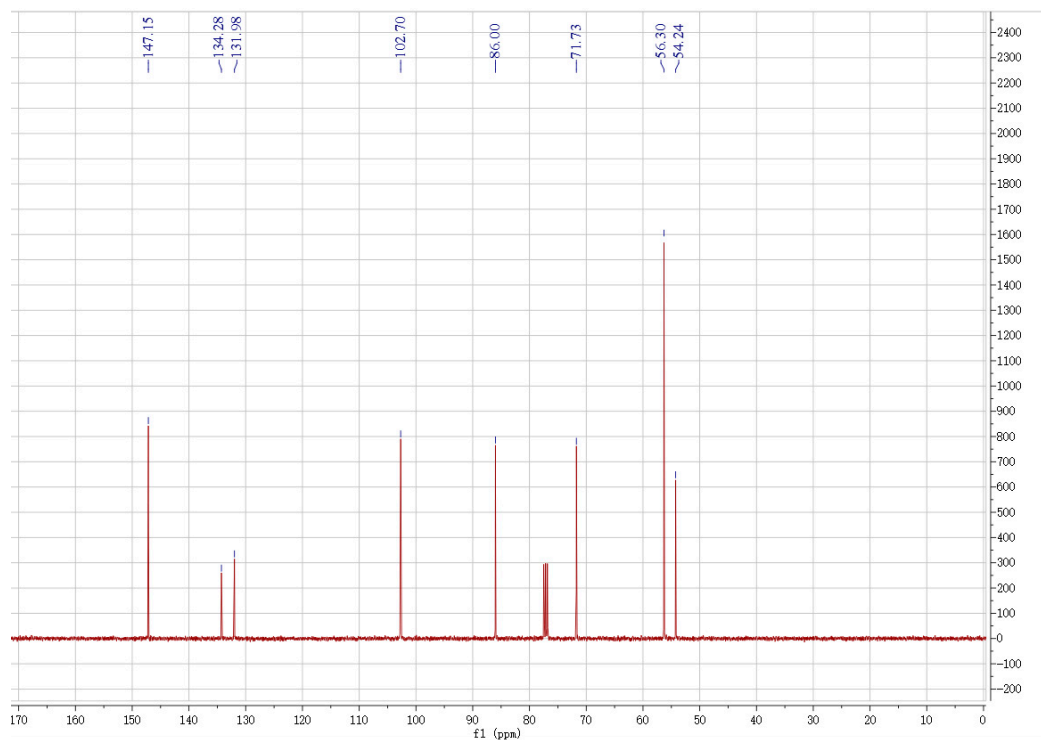

Figure S5. <sup>13</sup>C NMR (100 MHz, CDCl<sub>3</sub>) spectrum of **2**

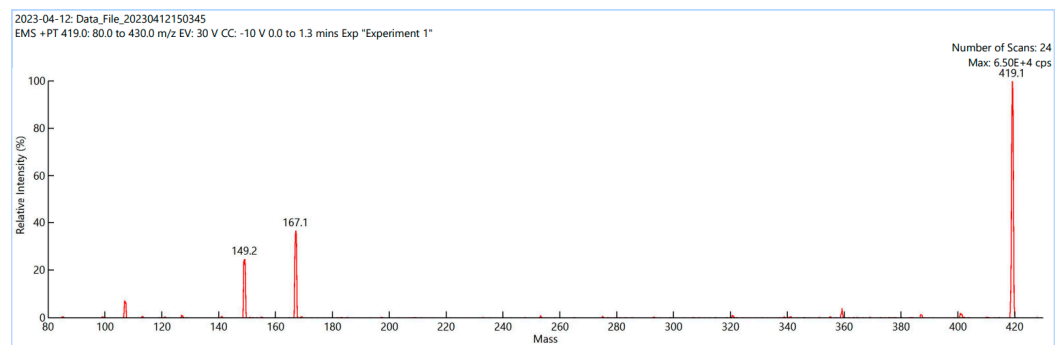

Figure S6. ESI-MS spectrum of **2**

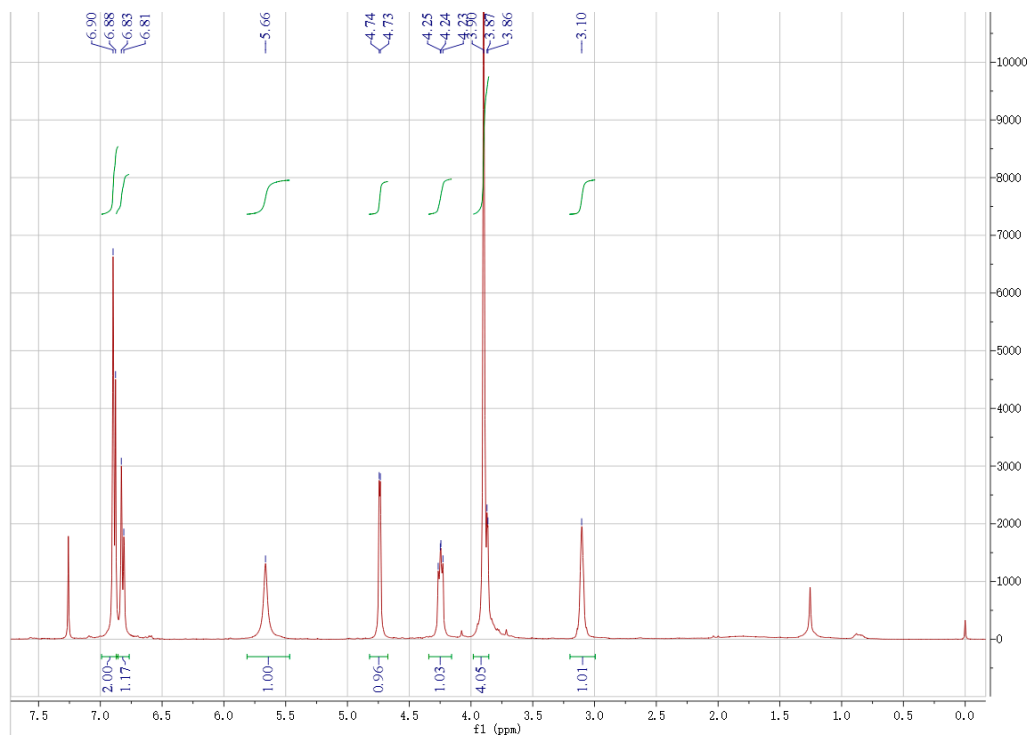

Figure S7. <sup>1</sup>H NMR (400 MHz, CDCl<sub>3</sub>) spectrum of **3**

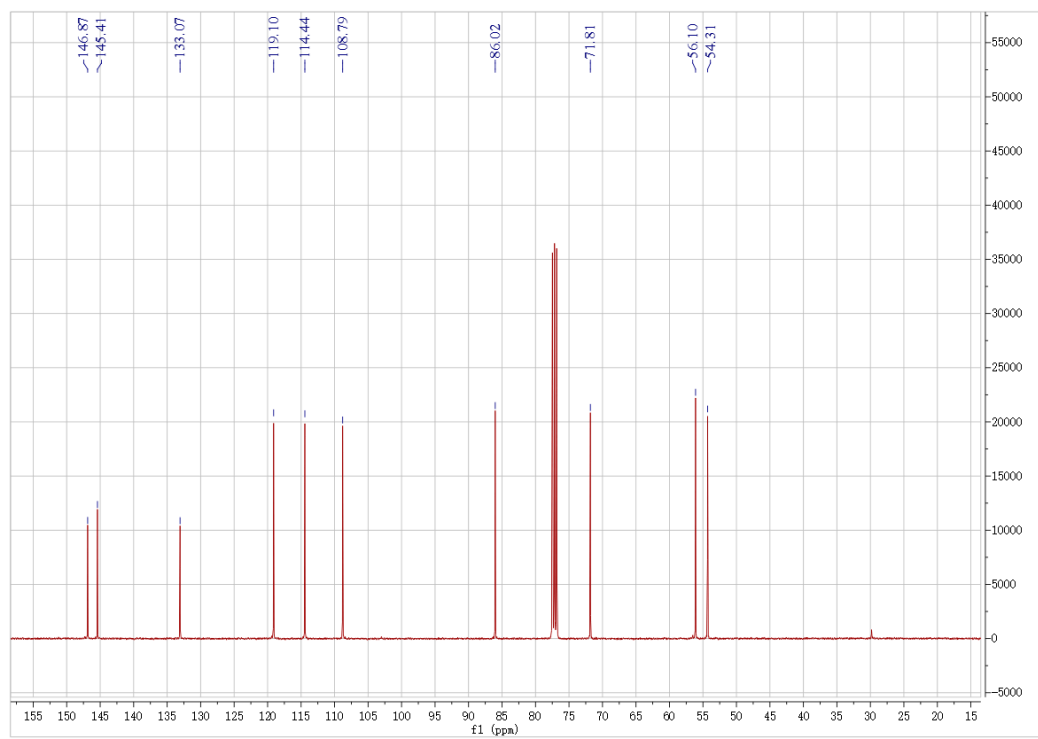

Figure S8. <sup>13</sup>C NMR (100 MHz, CDCl<sub>3</sub>) spectrum of **3**

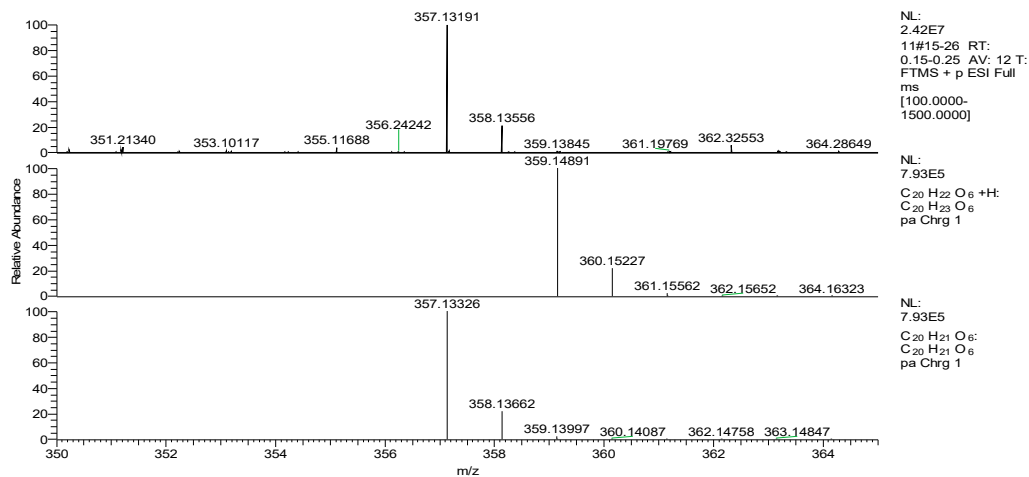

Figure S9. HRESI-MS spectrum of **3**

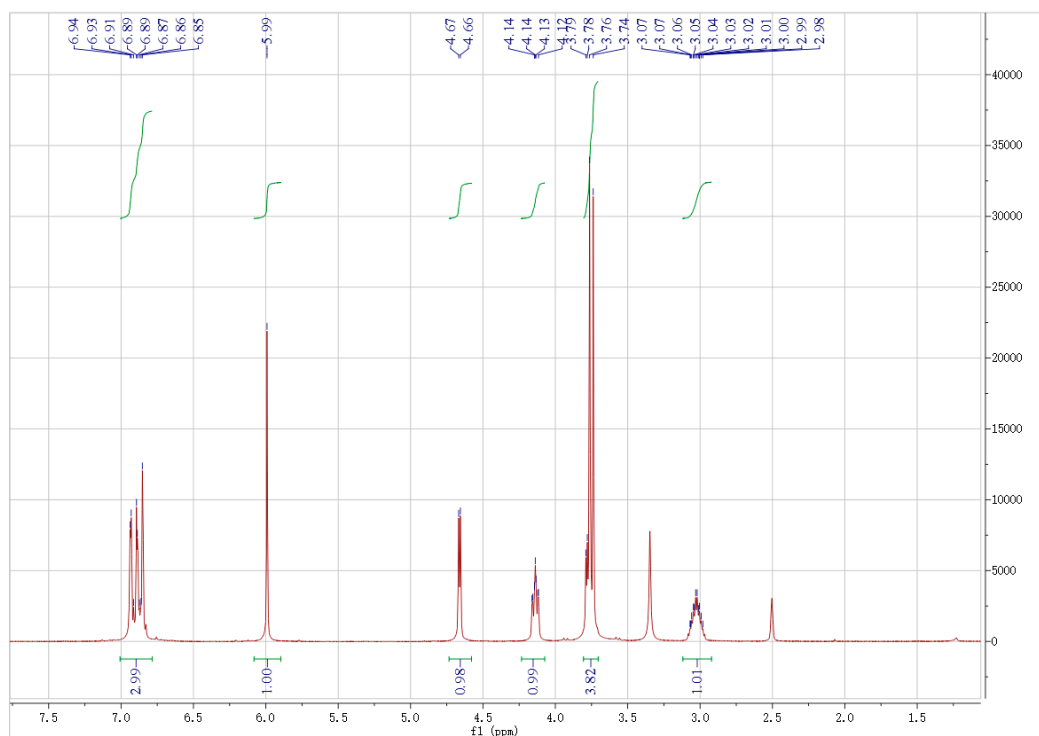

Figure S10. <sup>1</sup>H NMR (400 MHz, DMSO-*d*<sub>6</sub>) spectrum of **4**

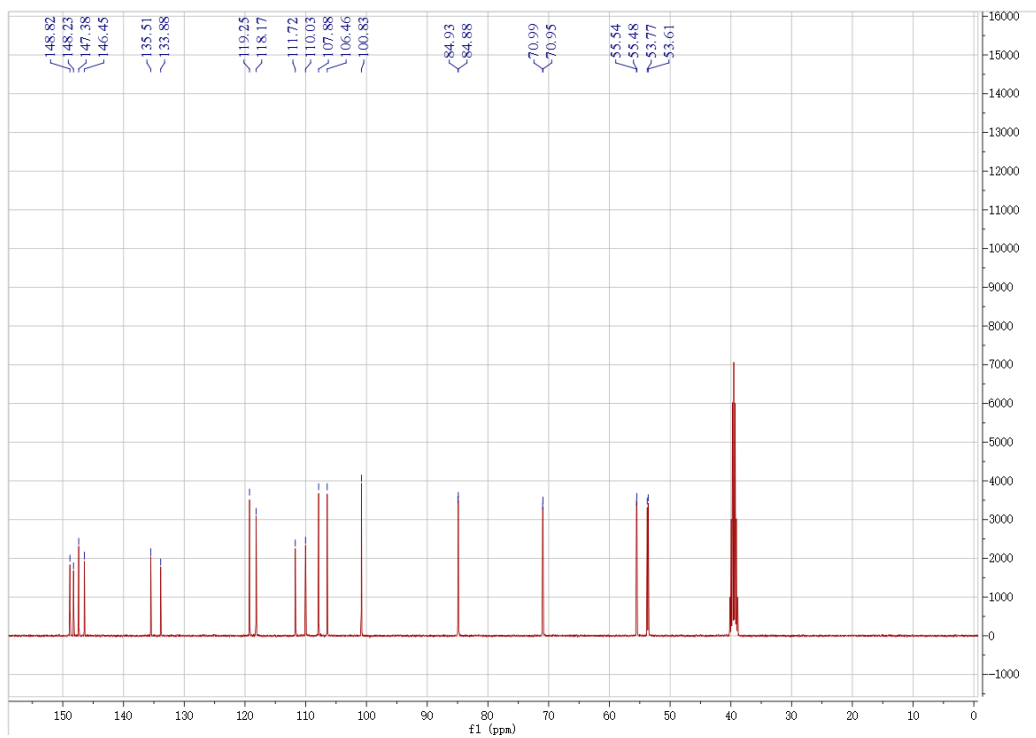

Figure S11.  $^{13}\text{C}$  NMR (100 MHz,  $\text{DMSO-d}_6$ ) spectrum of **4**

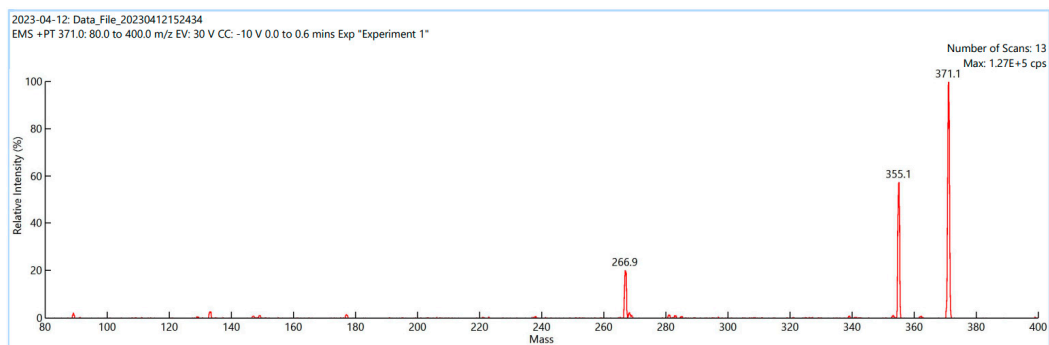

Figure S12. ESI-MS spectrum of **4**



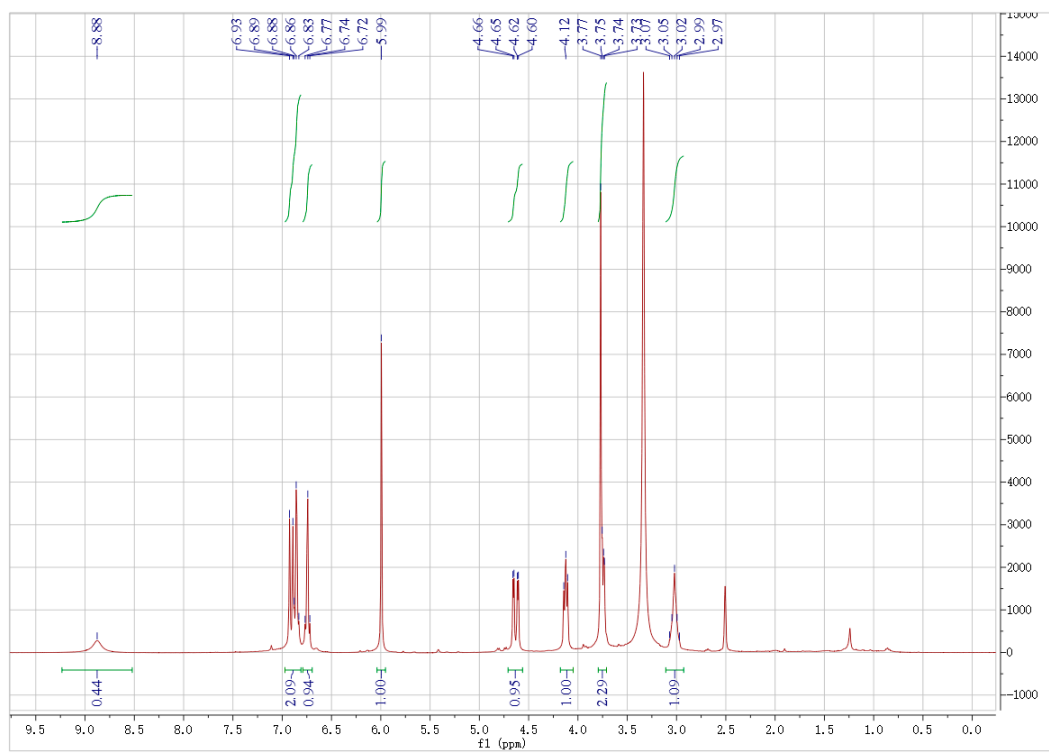

Figure S13. <sup>1</sup>H NMR (400 MHz, DMSO-*d*<sub>6</sub>) spectrum of **5**

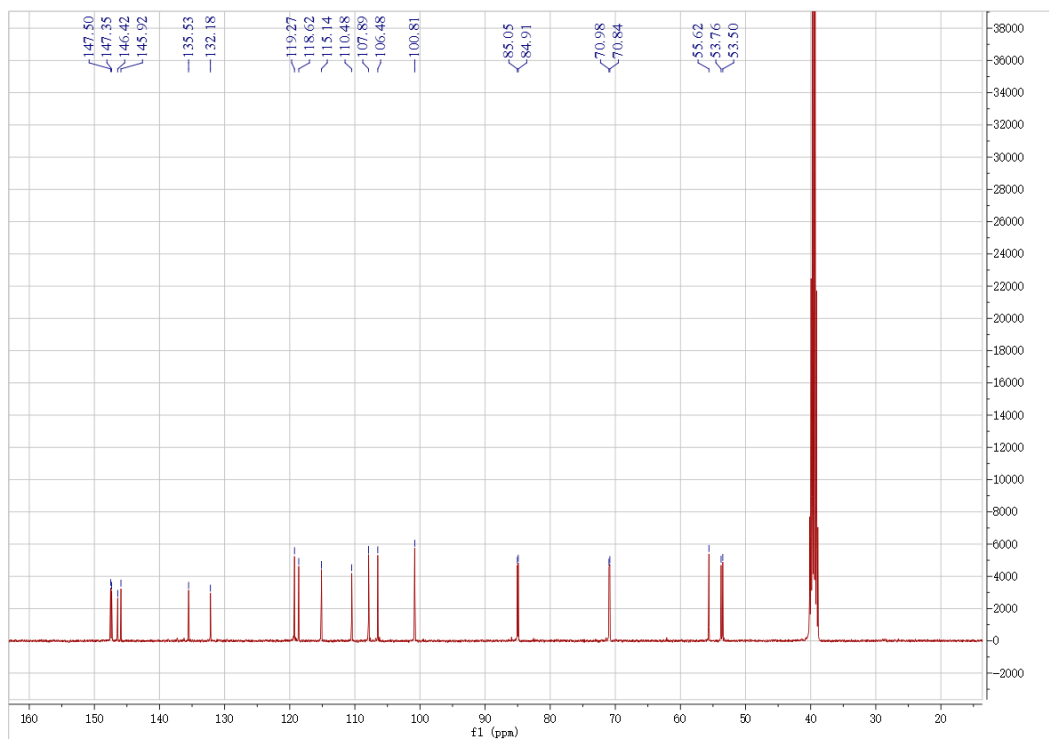

Figure S14. <sup>13</sup>C NMR (100 MHz, DMSO-*d*<sub>6</sub>) spectrum of **5**

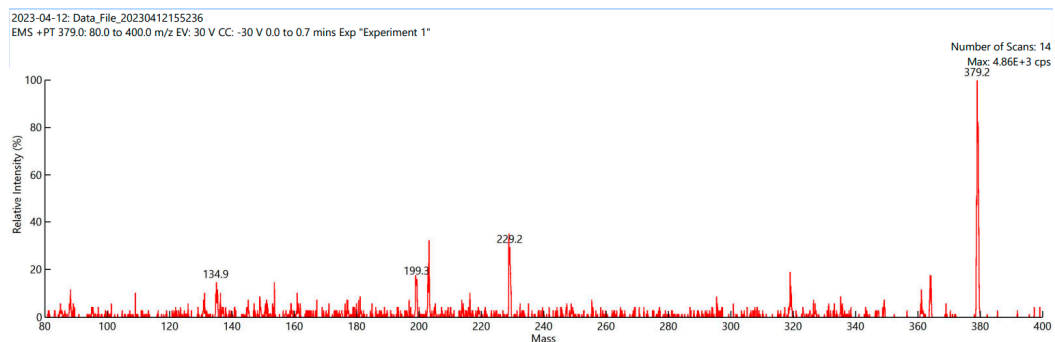

Figure S15. ESI-MS spectrum of **5**

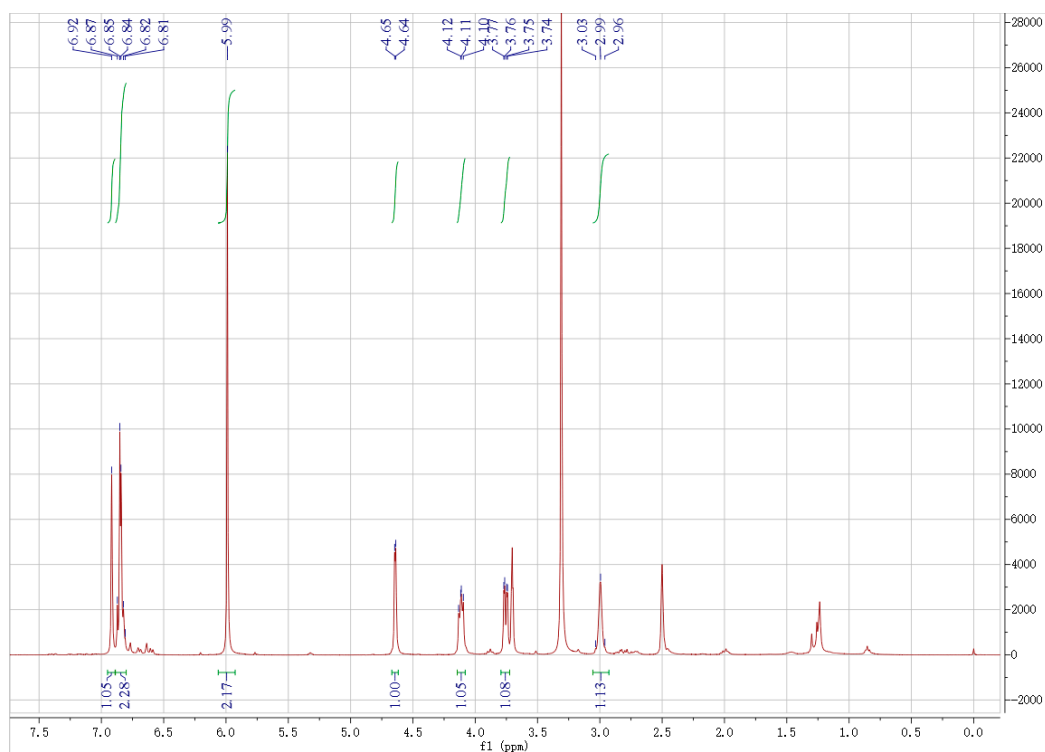

Figure S16. <sup>1</sup>H NMR (400 MHz, DMSO-*d*<sub>6</sub>) spectrum of **6**

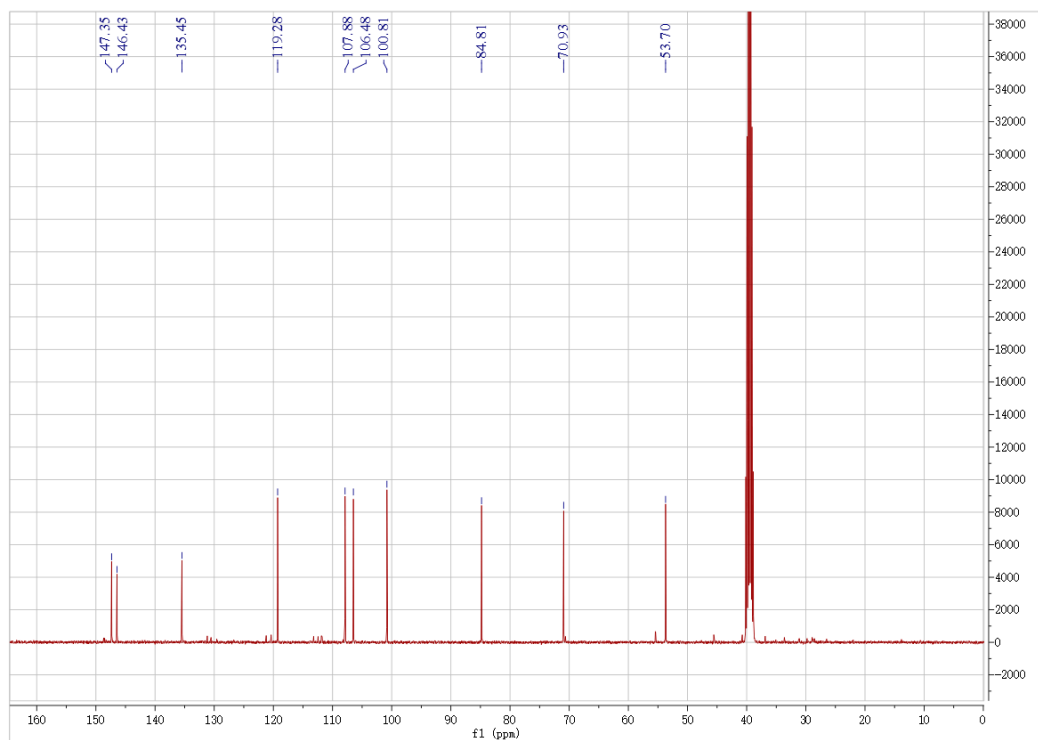

Figure S17.  $^{13}\text{C}$  NMR (100 MHz,  $\text{DMSO-d}_6$ ) spectrum of **6**

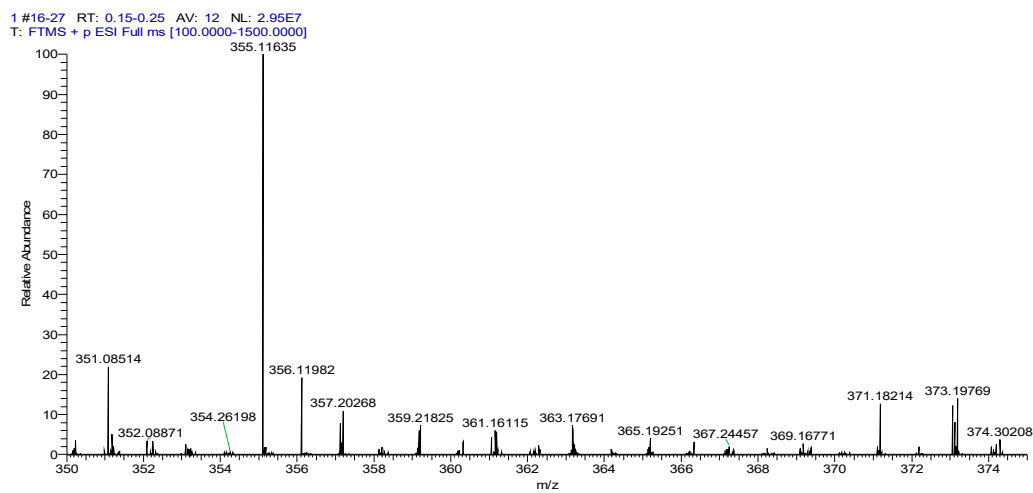

Figure S18. HRESI-MS spectrum of **6**

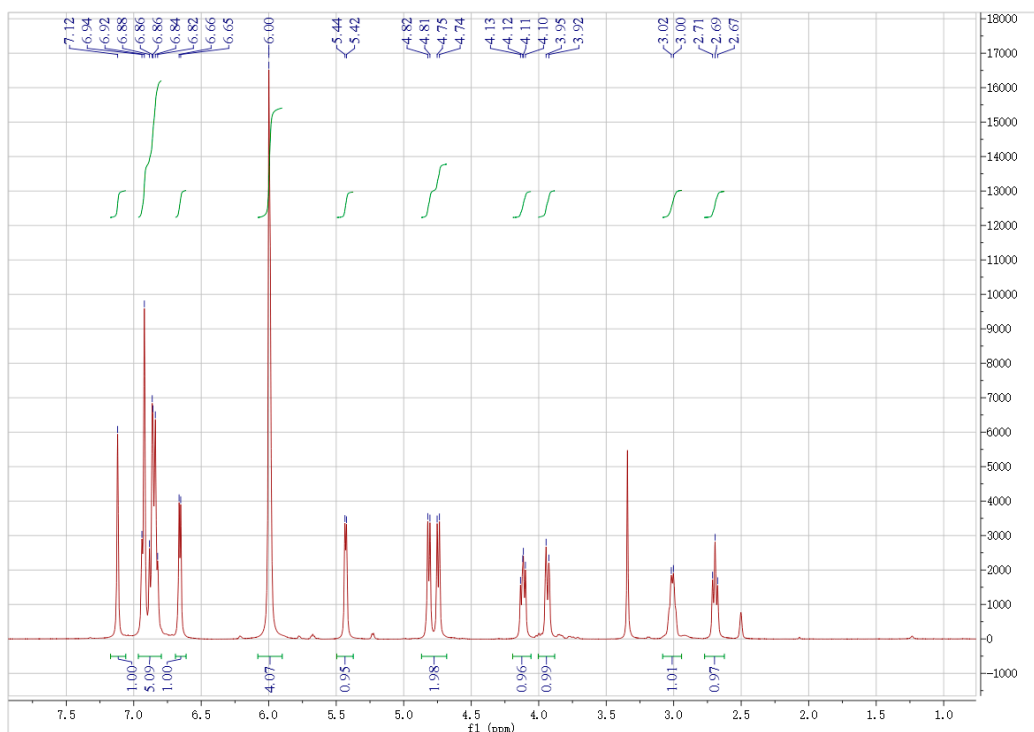

Figure S19. <sup>1</sup>H NMR (400 MHz, DMSO-*d*<sub>6</sub>) spectrum of **7**

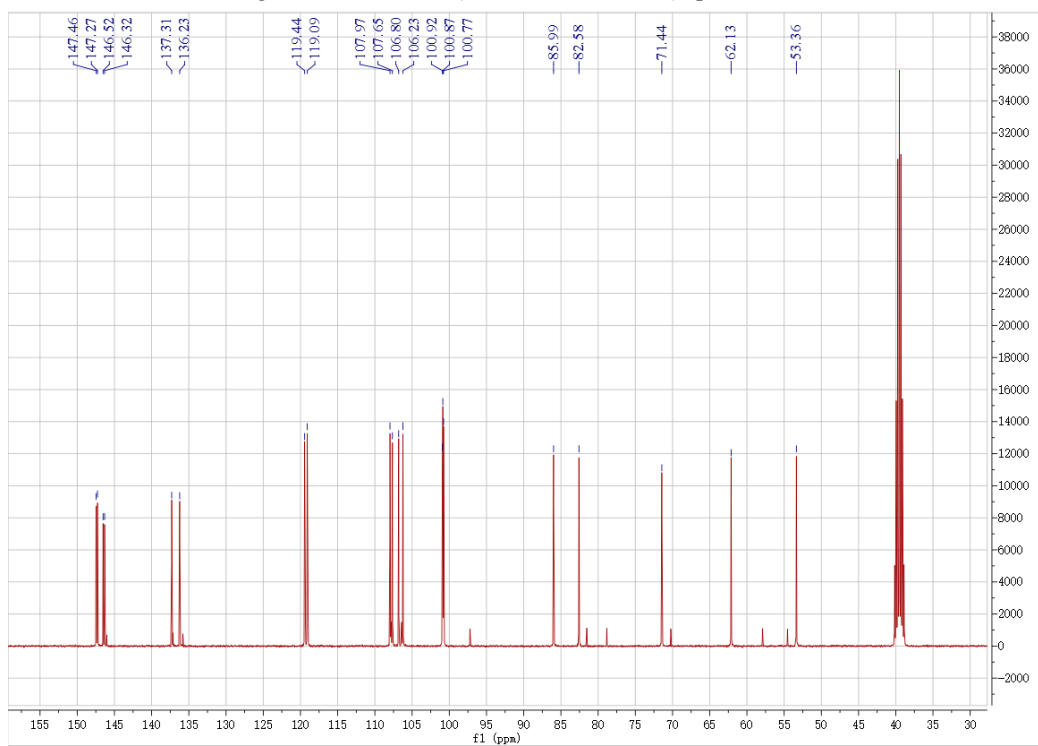

Figure S20. <sup>13</sup>C NMR (100 MHz, DMSO-*d*<sub>6</sub>) spectrum of **7**

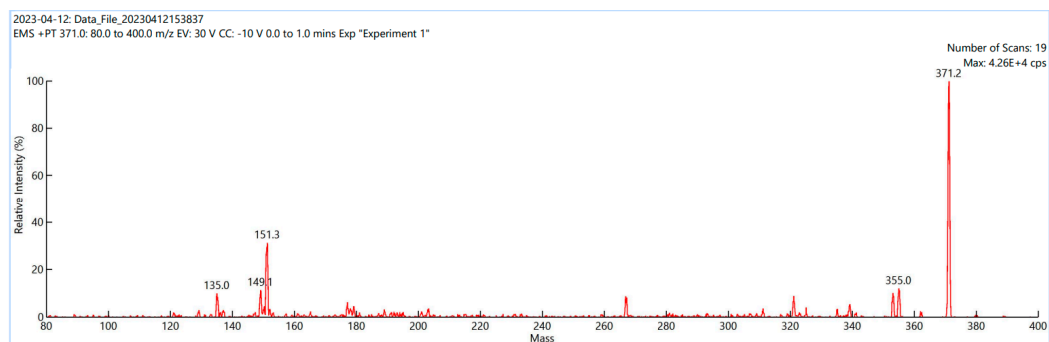

Figure S21. ESI-MS spectrum of **7**

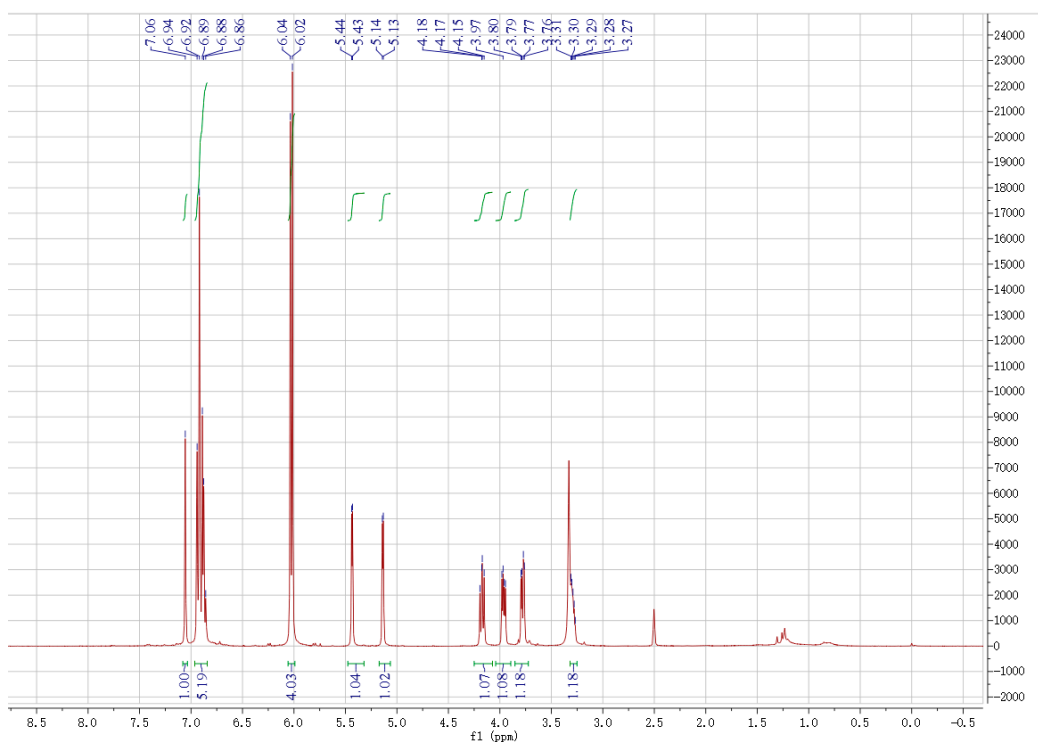

Figure S22.  $^1\text{H}$  NMR (400 MHz,  $\text{DMSO}-d_6$ ) spectrum of **8**

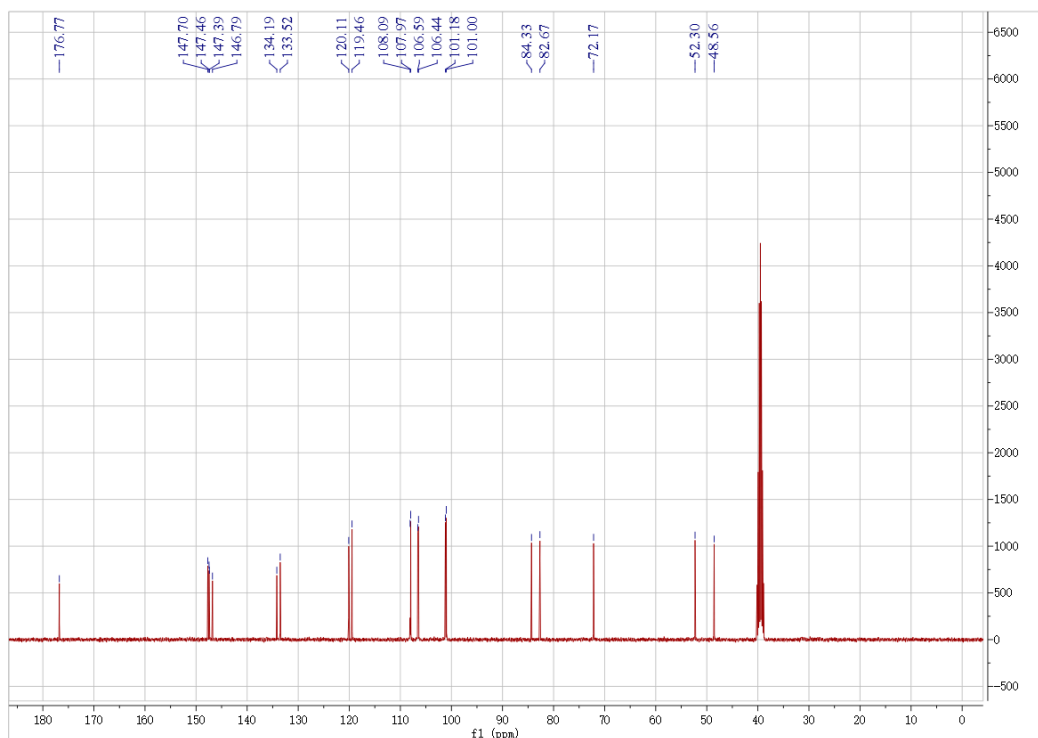

Figure S23.  $^{13}\text{C}$  NMR (100 MHz,  $\text{DMSO-d}_6$ ) spectrum of **8**

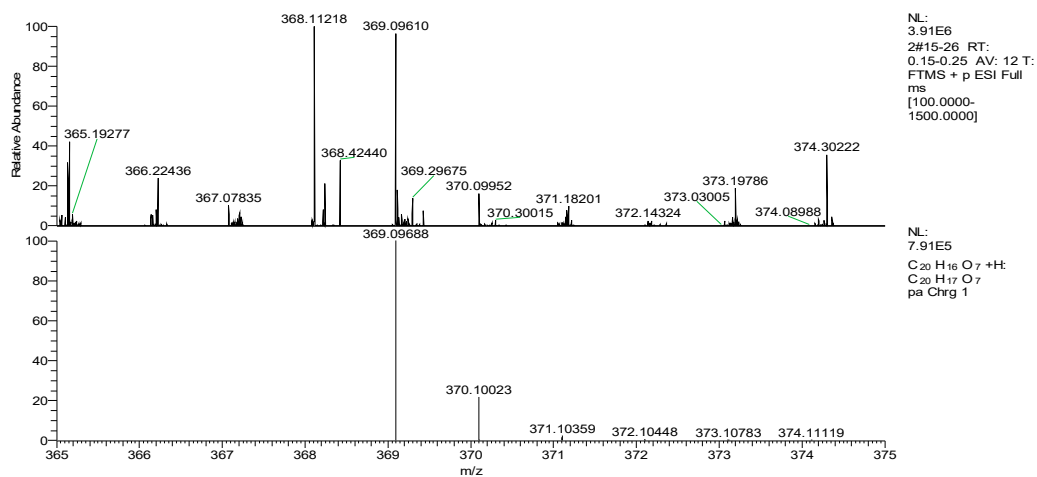

Figure S24. HRESI-MS spectrum of **8**

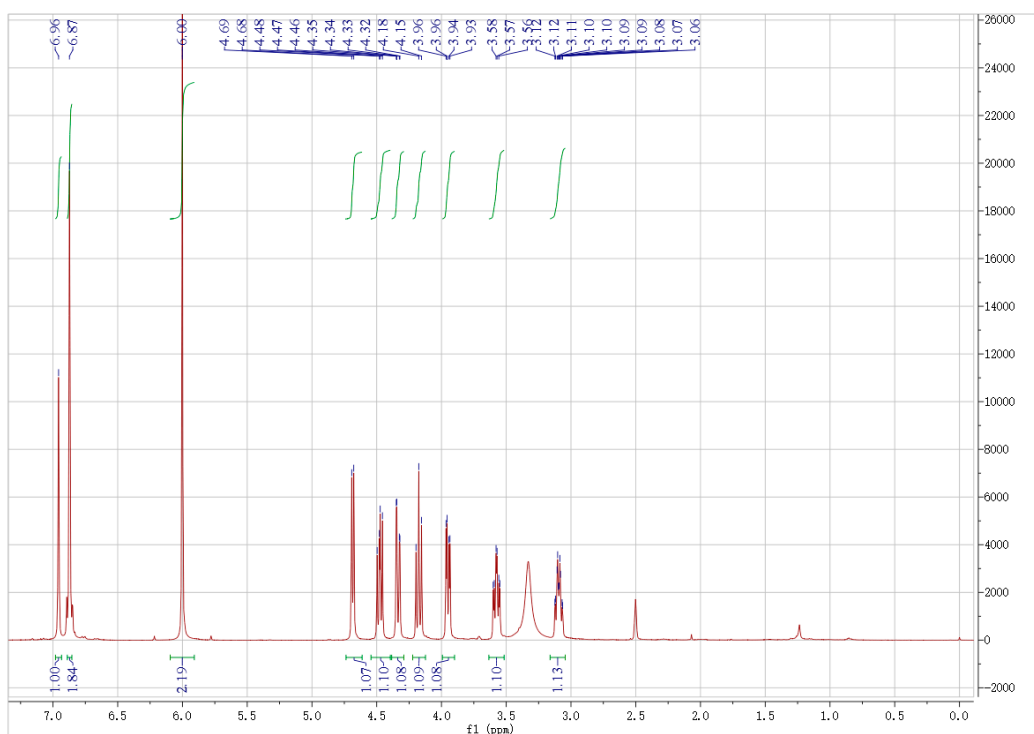

Figure S25. <sup>1</sup>H NMR (400 MHz, DMSO-*d*<sub>6</sub>) spectrum of **9**

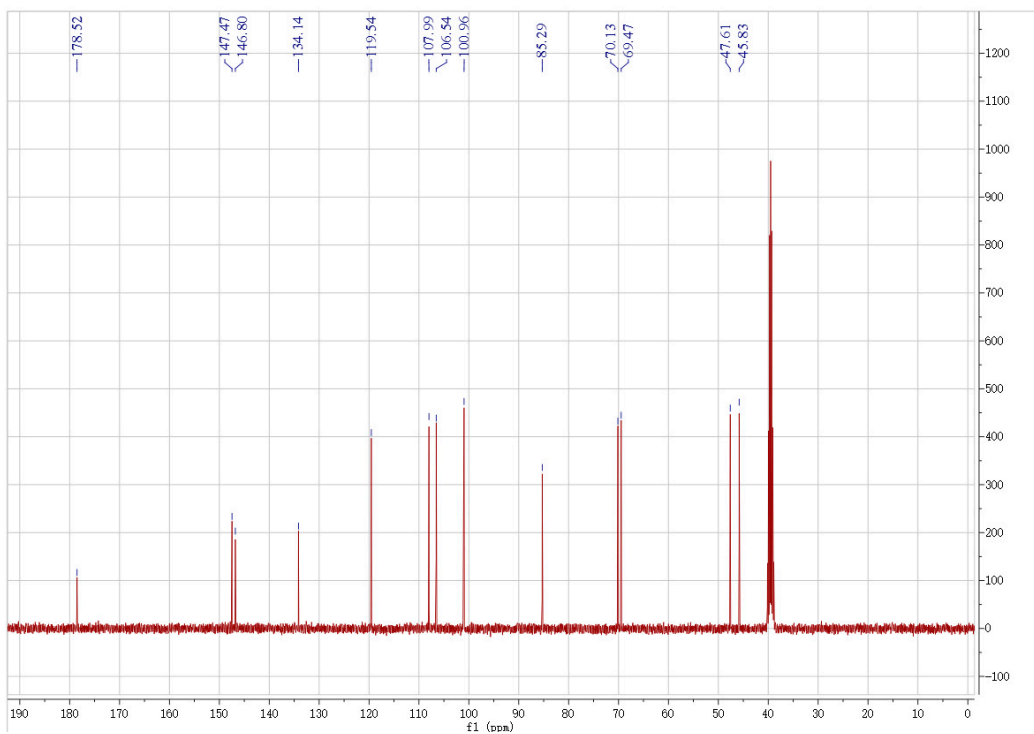

Figure S26. <sup>13</sup>C NMR (100 MHz, DMSO-*d*<sub>6</sub>) spectrum of **9**

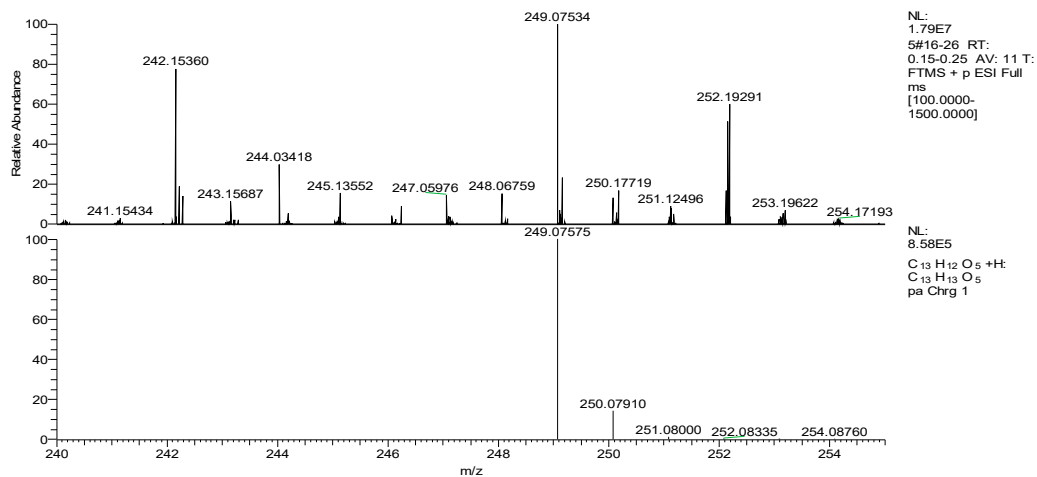

Figure S27. HRESI-MS spectrum of **9**

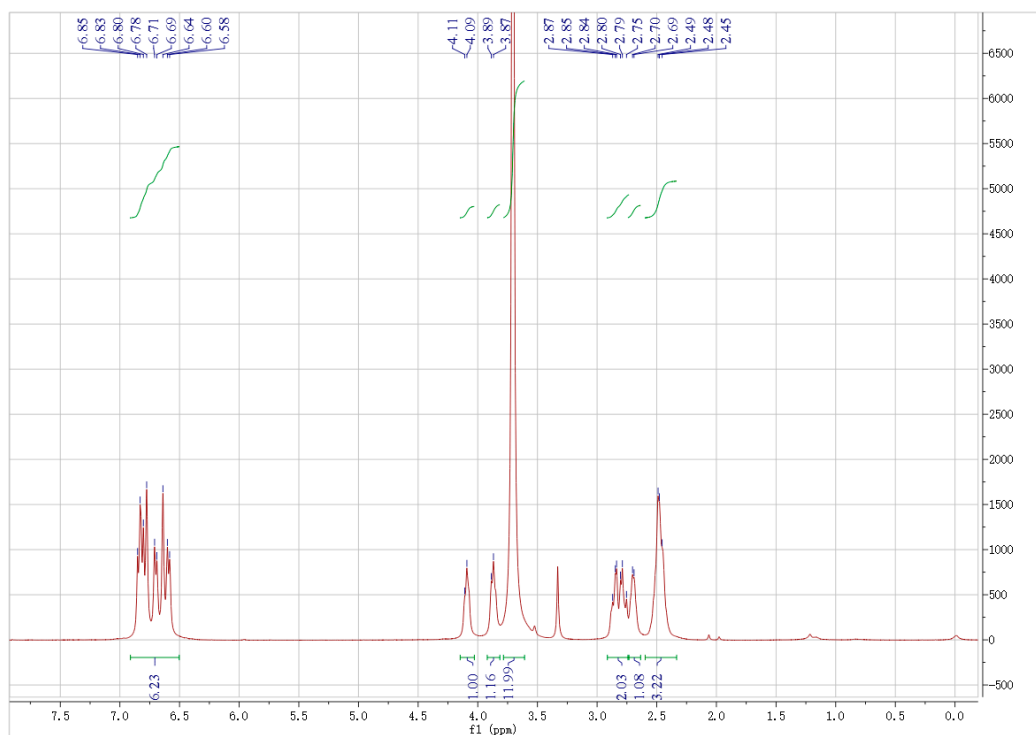

Figure S28. <sup>1</sup>H NMR (400 MHz, DMSO-*d*<sub>6</sub>) spectrum of **10**



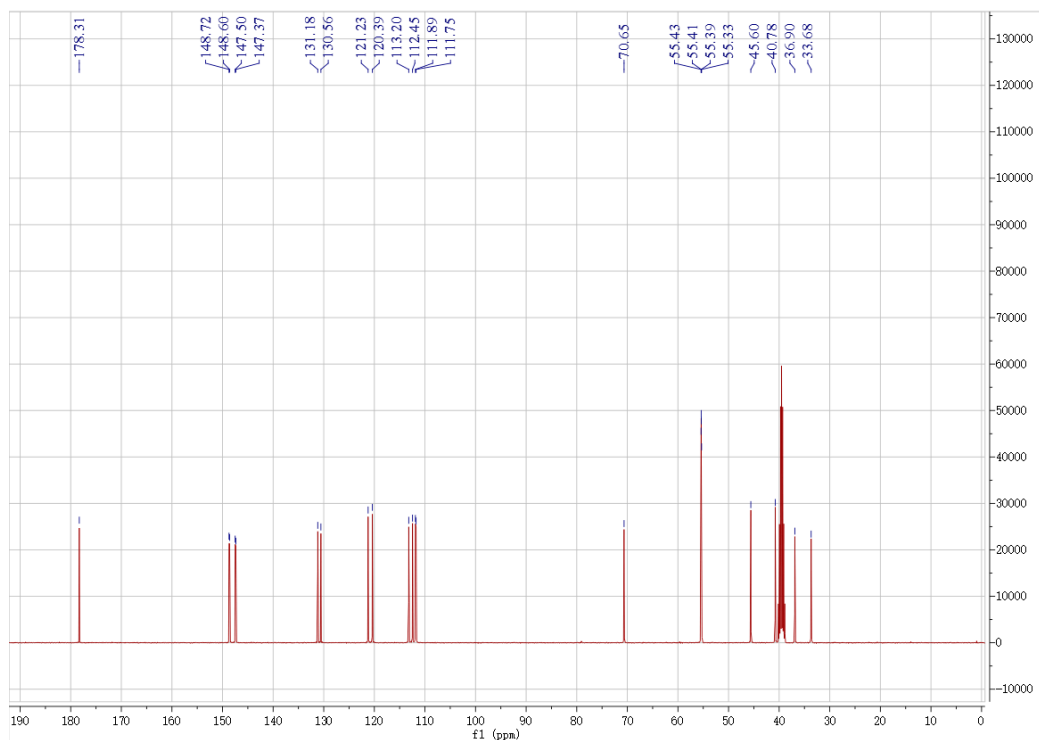

Figure S29. <sup>13</sup>C NMR (100 MHz, DMSO-d<sub>6</sub>) spectrum of **10**

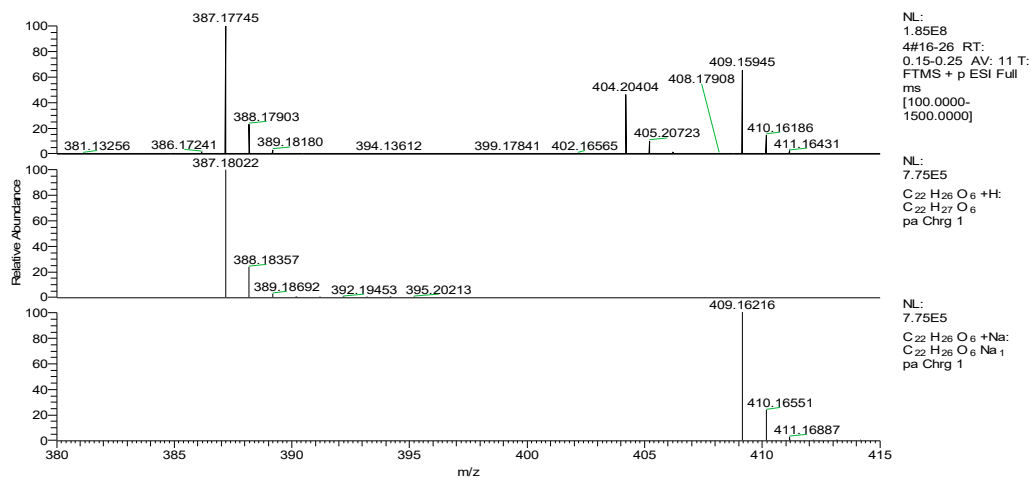

Figure S30. HRESI-MS spectrum of **10**

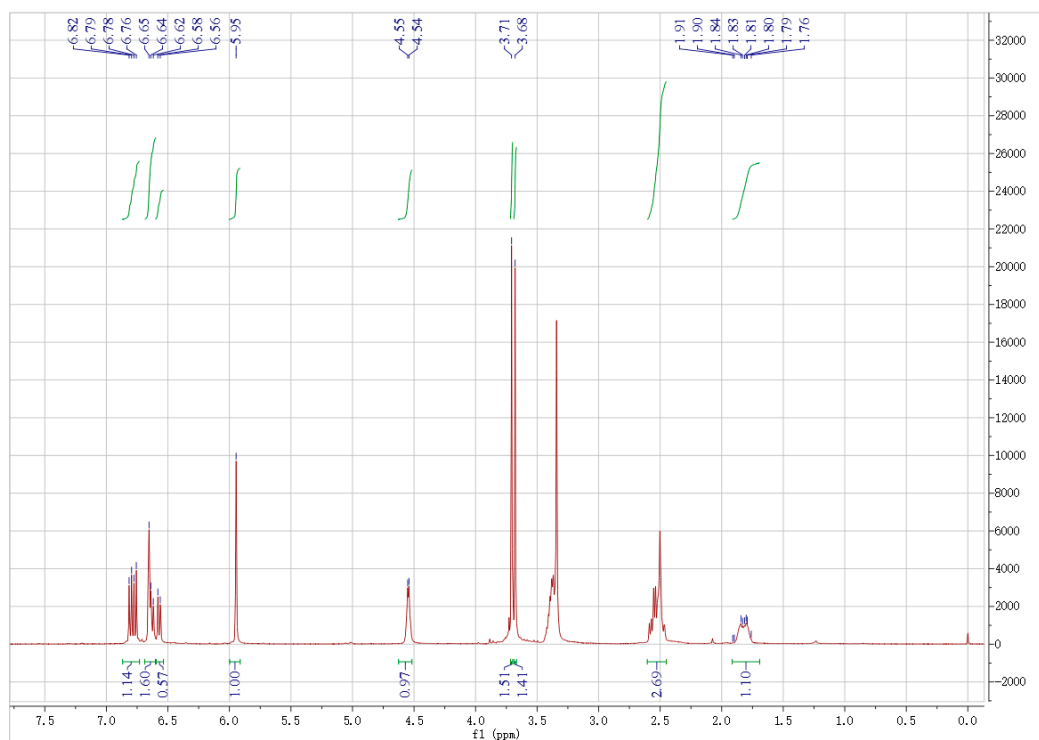

Figure S31. <sup>1</sup>H NMR (400 MHz, DMSO-*d*<sub>6</sub>) spectrum of **11**

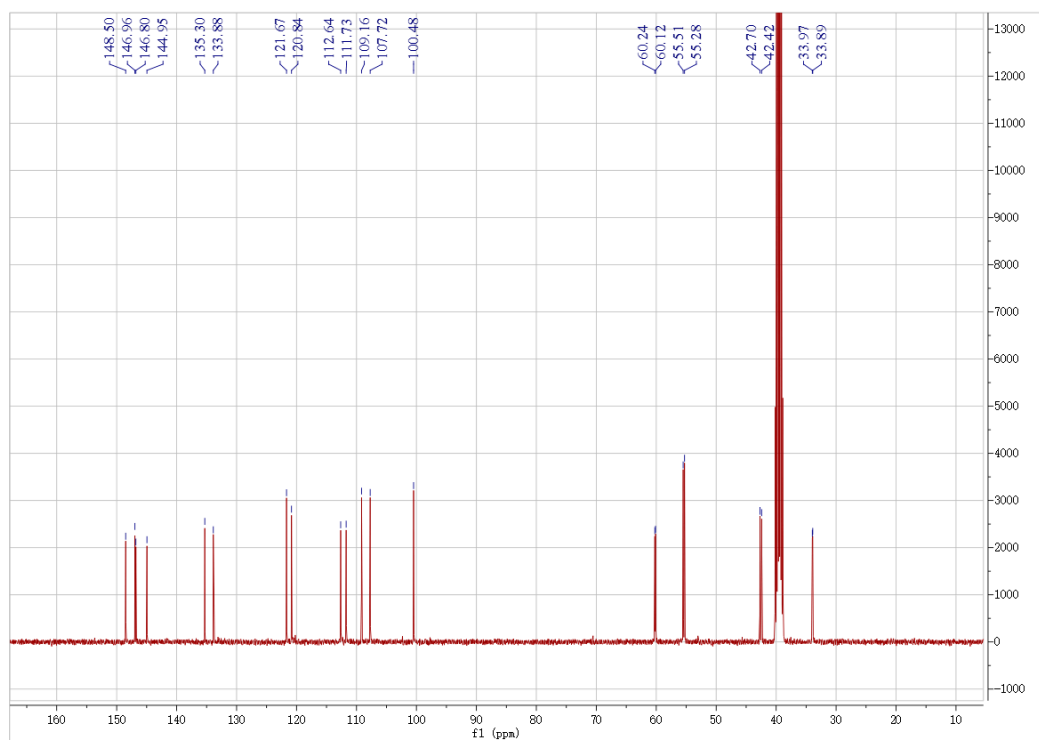

Figure S32. <sup>13</sup>C NMR (100 MHz, DMSO-*d*<sub>6</sub>) spectrum of **11**

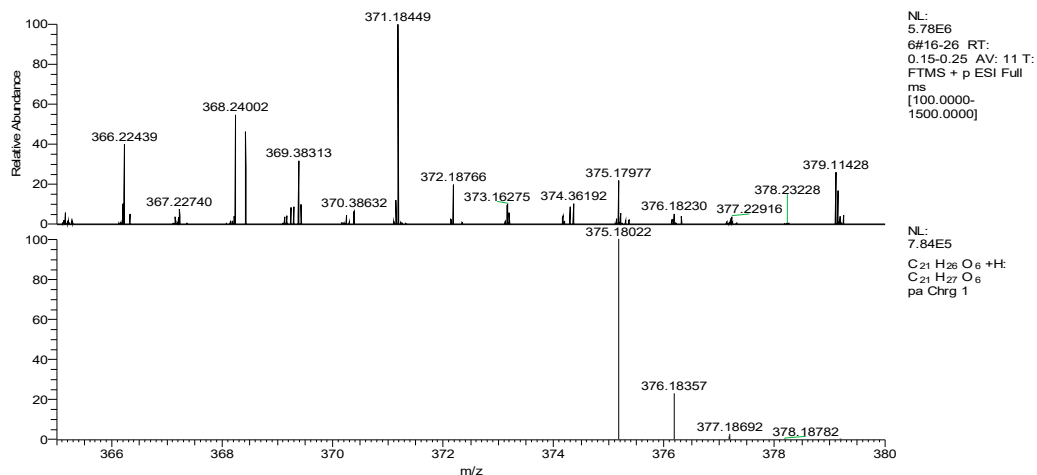

Figure S33. HRESI-MS spectrum of **11**

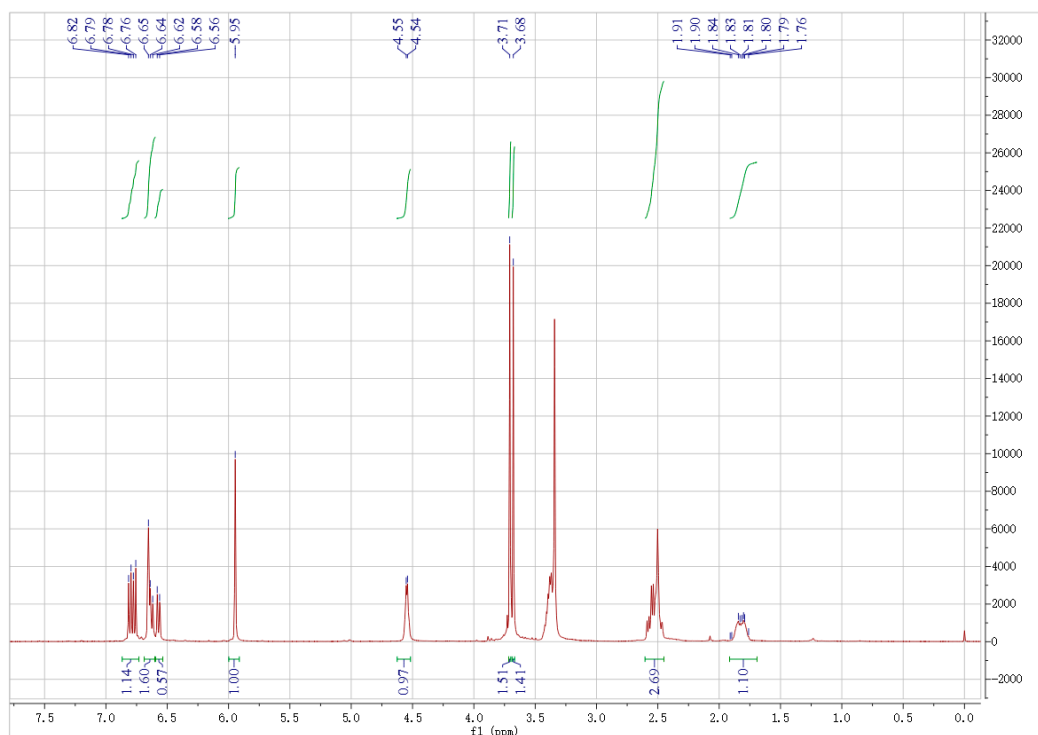

Figure S34. <sup>1</sup>H NMR (400 MHz, DMSO-*d*<sub>6</sub>) spectrum of **12**

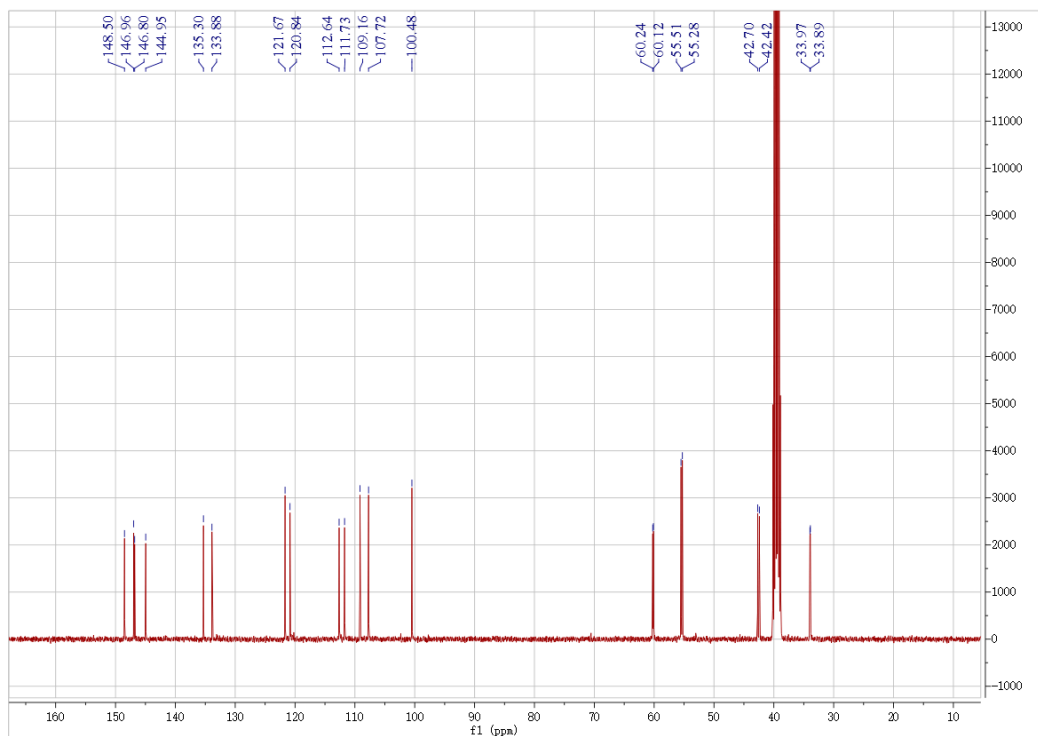

Figure S35.  $^{13}\text{C}$  NMR (100 MHz,  $\text{DMSO-d}_6$ ) spectrum of **12**

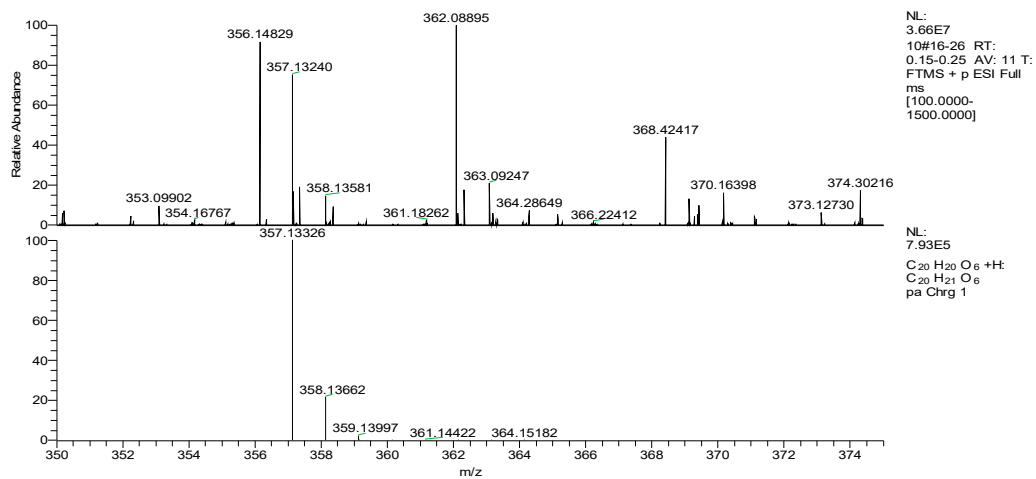

Figure S36. HRESI-MS spectrum of **12**

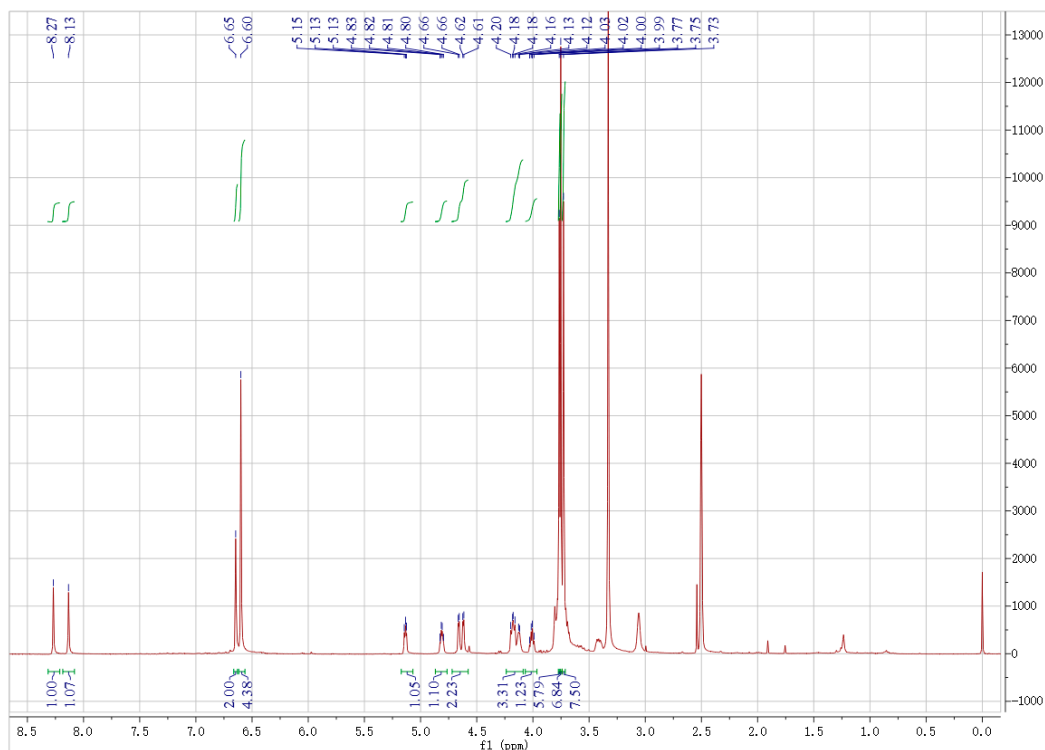

Figure S37. <sup>1</sup>H NMR (400 MHz, DMSO-*d*<sub>6</sub>) spectrum of **13**

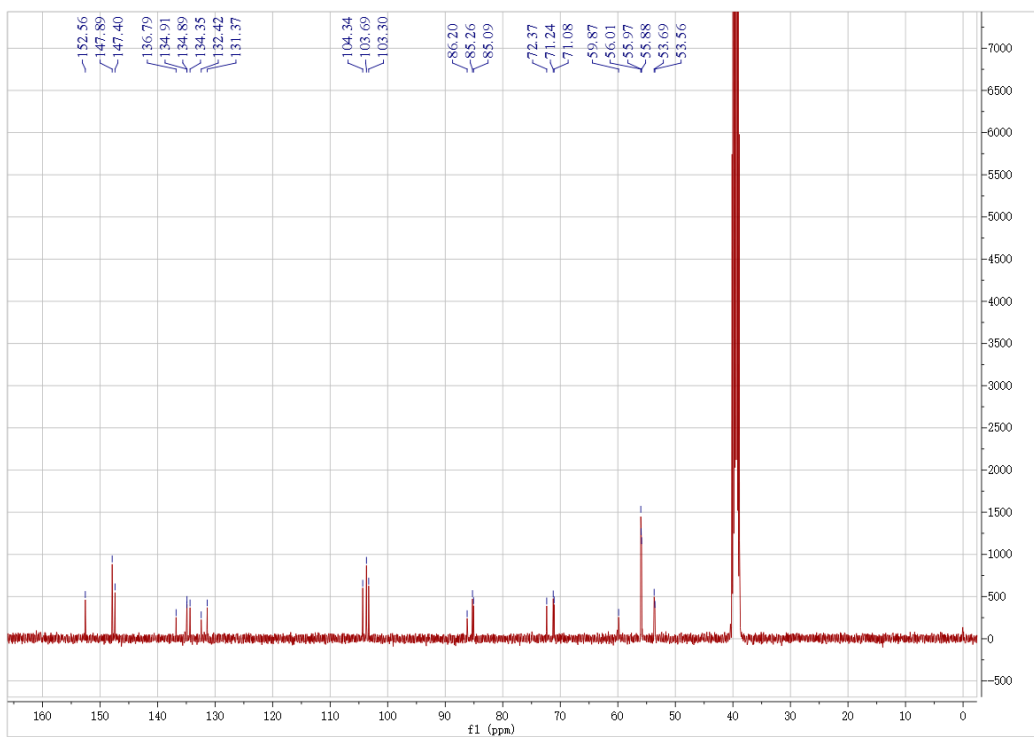

Figure S38. <sup>13</sup>C NMR (100 MHz, DMSO-*d*<sub>6</sub>) spectrum of **13**

7 #16-26 RT: 0.15-0.25 AV: 11 NL: 6.25E8  
T: FTMS + p ESI Full ms [100.0000-1500.0000]

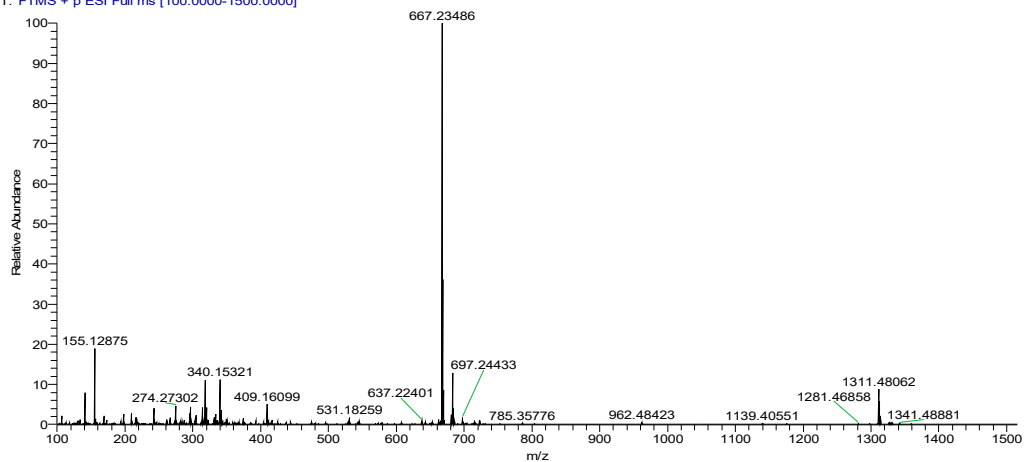

Figure S39. HRESI-MS spectrum of **13**

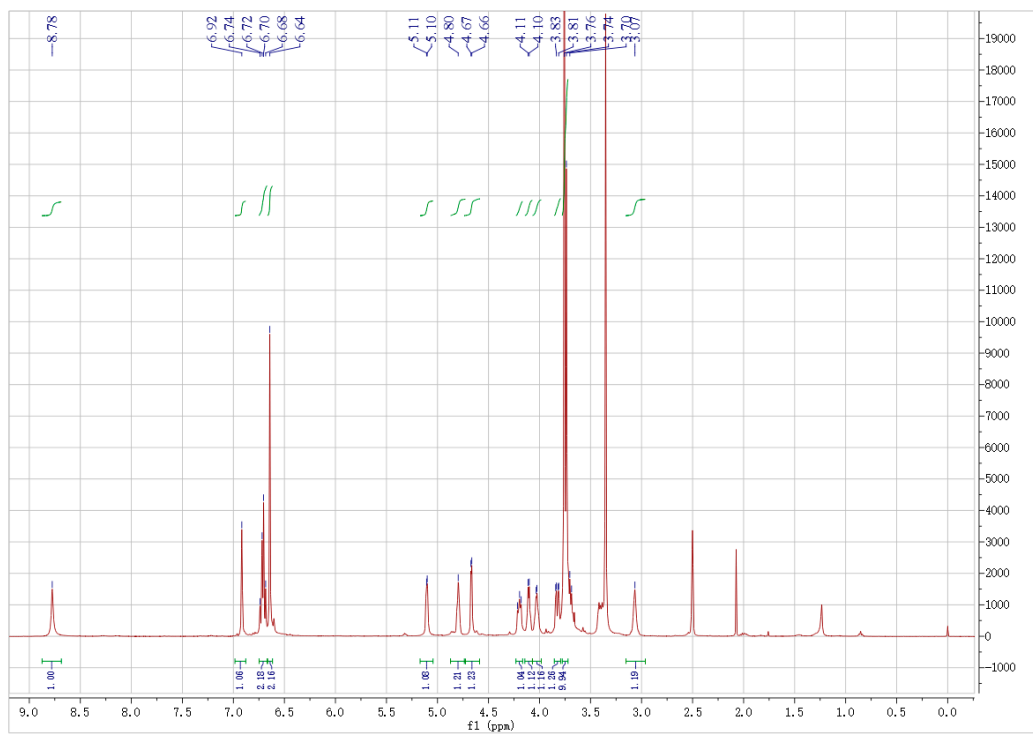

Figure S40. <sup>1</sup>H NMR (400 MHz, DMSO-*d*<sub>6</sub>) spectrum of **14**

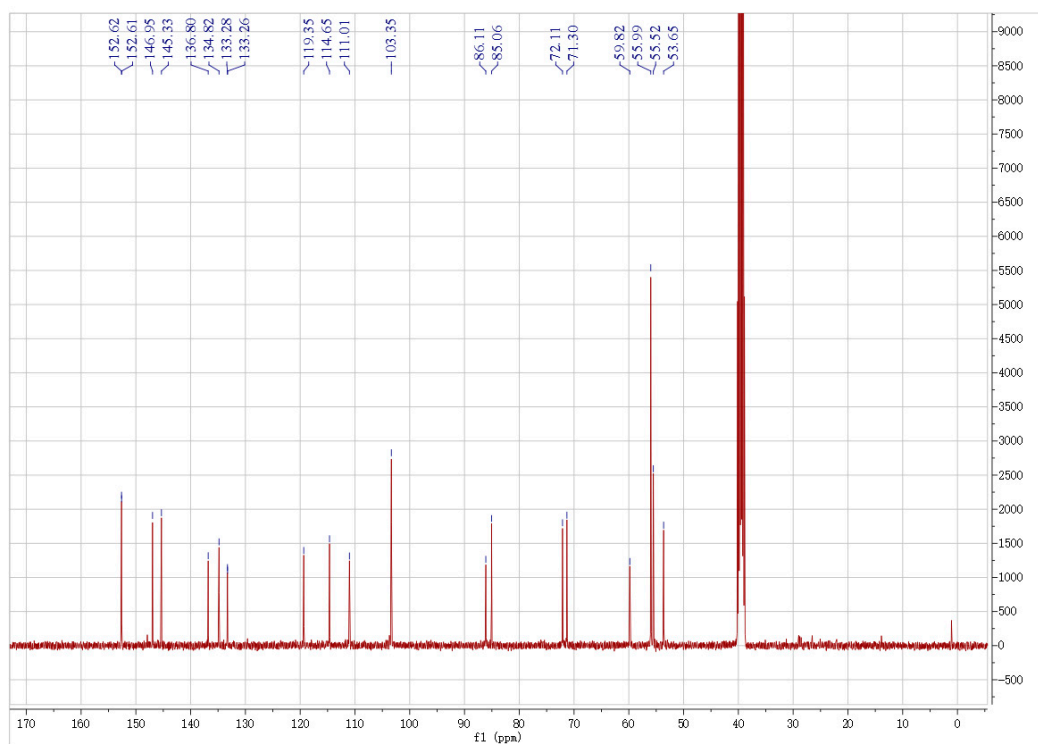

Figure S41.  $^{13}\text{C}$  NMR (100 MHz,  $\text{DMSO-d}_6$ ) spectrum of **14**

8 #16-26 RT: 0.15-0.25 AV: 11 NL: 6.69E8  
T: FTMS + p ESI Full ms [100.0000-1500.0000]

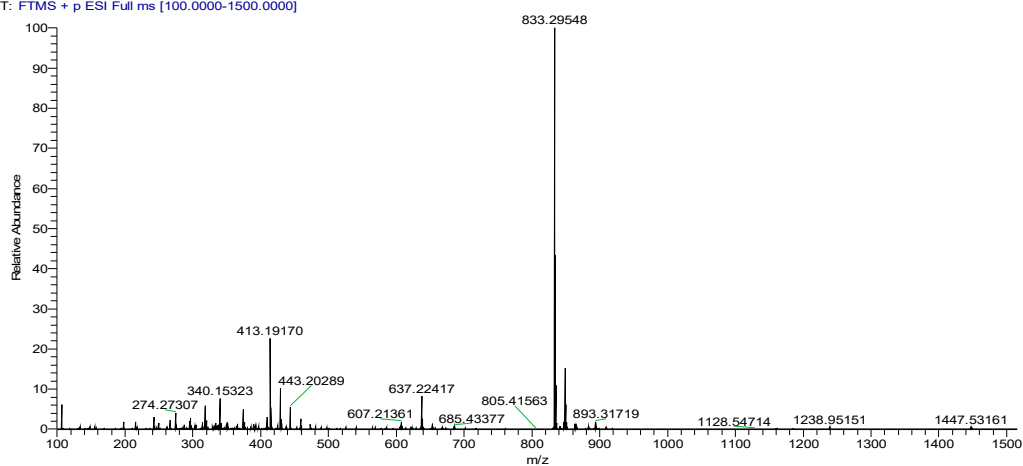

Figure S42. HRESI-MS spectrum of **14**

| Compound 1           |                                            |                                            |                               |                                 |
|----------------------|--------------------------------------------|--------------------------------------------|-------------------------------|---------------------------------|
| NO.                  | <sup>1</sup> H NMR data(Exp)               | <sup>1</sup> HNMR data(Ref 5)              | <sup>13</sup> C NMR data(Exp) | <sup>13</sup> C NMR data(Ref 5) |
| 3,5                  | —                                          | —                                          | 147.3                         | 147.2                           |
| 3'                   | —                                          | —                                          | 146.9                         | 146.7                           |
| 4'                   | 5.65 (1H, s, OH)                           | 5.59 (1 H, s, OH)                          | 145.4                         | 145.3                           |
| 4                    | 5.54 (1H, OH)                              | 5.48 (1 H, OH)                             | 134.4                         | 134.3                           |
| 1'                   | —                                          | —                                          | 133                           | 132.9                           |
| 1                    | —                                          | —                                          | 132.3                         | 132.1                           |
| 6'                   | 6.88 (1 H, d, J = 2.0 Hz)                  | 6.89 (1 H, d, J = 2.1 Hz)                  | 119.1                         | 118.9                           |
| 5'                   | 6.82 (1H, dd, J = 8.1, 1.8 Hz)             | 6.82 (1 H, dd, J = 8.2 and 1.8 Hz)         | 114.4                         | 114.3                           |
| 2'                   | 6.90 (1H, d, J = 2.0 Hz)                   | 6.90 (1 H, d, J = 2.1 Hz)                  | 108.8                         | 108.6                           |
| 2,6                  | 6.59 (2H, s)                               | 6.59 (2H, s)                               | 102.9                         | 102.7                           |
| 7                    | 4.74 (2H, dd, J = 11.4, 4.4 Hz)            | 4.75 (2H, d, J=4.2 Hz)                     | 86.3                          | 86.1                            |
| 9'                   |                                            |                                            | 86                            | 85.8                            |
| 9                    | 4.36–4.17 (2H, m); 3.84–3.77 (2H, m )      | 4.27 (2H, m); 3.88 (2H, m )                | 72                            | 71.9                            |
| 7'                   |                                            |                                            | 71.8                          | 71.6                            |
| 3,5-OCH <sub>3</sub> | 3.90 (9H, s, C-3, 3', 5-OCH <sub>3</sub> ) | 3.90 (9H, s, C-3, 3', 5-OCH <sub>3</sub> ) | 56.5                          | 56.4                            |
| 3'-OCH <sub>3</sub>  |                                            |                                            | 56.1                          | 56                              |
| 8                    | 3.16–2.99 (2H, m)                          | 3.10 (2H, m )                              | 54.5                          | 54.4                            |
| 8'                   |                                            |                                            | 54.2                          | 54.1                            |

| Compound 2             |                                                            |                                                            |                               |                                 |
|------------------------|------------------------------------------------------------|------------------------------------------------------------|-------------------------------|---------------------------------|
| NO.                    | <sup>1</sup> H NMR data(Exp)                               | <sup>1</sup> HNMR data(Ref 6)                              | <sup>13</sup> C NMR data(Exp) | <sup>13</sup> C NMR data(Ref 6) |
| 3,5                    | —                                                          | —                                                          | 147.1                         | 147.2                           |
| 3'                     | —                                                          | —                                                          | 147.1                         | 147.2                           |
| 4'                     | —                                                          | —                                                          | 134.3                         | 134.4                           |
| 4                      | —                                                          | —                                                          | 134.3                         | 134.4                           |
| 1'                     | —                                                          | —                                                          | 132                           | 132.1                           |
| 1                      | —                                                          | —                                                          | 132                           | 132.1                           |
| 6'                     | 6.57 (1H, s)                                               | 6.55 (1H, s)                                               | 102.7                         | 102.8                           |
| 5'                     | —                                                          | —                                                          | 147.1                         | 147.2                           |
| 2'                     | 6.57 (1H, s)                                               | 6.55 (1H, s)                                               | 102.7                         | 102.8                           |
| 2,6                    | 6.57 (2H, s)                                               | 6.55 (2H, s)                                               | 102.7                         | 102.8                           |
| 7                      | 4.72 (2H, d, J=4.2 Hz)                                     | 4.70 (2H, d, J=4.2 Hz)                                     | 86                            | 86                              |
| 9'                     |                                                            |                                                            | 86                            | 86                              |
| 9                      | 4.27 (2H, dd, J=9.0, 6.7 Hz); 3.87 (2H, dd, J=9.0, 3.4 Hz) | 4.25 (2H, dd, J=9.0, 6.7 Hz); 3.88 (2H, dd, J=9.0, 3.4 Hz) | 71.7                          | 71.7                            |
| 7'                     |                                                            |                                                            | 71.7                          | 71.7                            |
| 3,5-OCH <sub>3</sub>   | 3.84 (12H, s)                                              | 3.84 (12H, s)                                              | 56.3                          | 56.3                            |
| 3',5'-OCH <sub>3</sub> |                                                            |                                                            | 56.3                          | 56.3                            |
| 8                      | 3.09 (2H, s)                                               | 3.08 (2H, s)                                               | 54.2                          | 54.3                            |
| 8'                     |                                                            |                                                            | 54.2                          | 54.3                            |



| Compound 3          |                                                                                      |                                                                                      |                               |                                 |
|---------------------|--------------------------------------------------------------------------------------|--------------------------------------------------------------------------------------|-------------------------------|---------------------------------|
| NO.                 | <sup>1</sup> H NMR data(Exp)                                                         | <sup>1</sup> HNMR data(Ref 7)                                                        | <sup>13</sup> C NMR data(Exp) | <sup>13</sup> C NMR data(Ref 7) |
| 3                   | —                                                                                    | —                                                                                    | 146.9 (C-3)                   | 146.7 (C-3)                     |
| 5                   | 6.81-6.90 (1H, m)                                                                    | 6.79-6.88 (1H, m)                                                                    | 114.4 (C-5)                   | 114.2 (C-5)                     |
| 3'                  | —                                                                                    | —                                                                                    | 146.9                         | 146.7                           |
| 4'                  | 5.66 (1H, s)                                                                         | 5.70 (1H, s)                                                                         | 145.4                         | 145.2                           |
| 4                   |                                                                                      |                                                                                      | 145.4                         | 145.2                           |
| 1'                  | —                                                                                    | —                                                                                    | 133.1                         | 132.8                           |
| 1                   | —                                                                                    | —                                                                                    | 133.1                         | 132.8                           |
| 6'                  | 6.81-6.90 (5H, m)                                                                    | 6.79-6.88 (5H, m)                                                                    | 119.1                         | 118.9                           |
| 5'                  |                                                                                      |                                                                                      | 114.4                         | 114.2                           |
| 2'                  |                                                                                      |                                                                                      | 108.8                         | 108.6                           |
| 2                   |                                                                                      |                                                                                      | 108.8(C-2)                    | 108.6(C-2)                      |
| 6                   |                                                                                      |                                                                                      | 119.1(C-6)                    | 118.9(C-6)                      |
| 7                   | 4.74 (2H, d, J = 4.0 Hz )                                                            | 4.71 (2H, d, J = 4.4 Hz )                                                            | 86                            | 85.8                            |
| 9'                  |                                                                                      |                                                                                      | 86                            | 85.8                            |
| 9                   | 4.25 (2H, dd, J = 8.8, 4.4 Hz, H-7'a, 9a); 3.87 (2H, dd, J = 8.8, 4.4 Hz, H-7'b, 9b) | 4.23 (2H, dd, J = 8.8, 4.4 Hz, H-7'a, 9a); 3.85 (2H, dd, J = 8.8, 4.4 Hz, H-7'b, 9b) | 71.8                          | 71.6                            |
| 7'                  |                                                                                      |                                                                                      | 71.8                          | 71.6                            |
| 3-OCH <sub>3</sub>  | 3.90 (6H, s)                                                                         | 3.87 (6H, s)                                                                         | 56.1                          | 55.9                            |
| 3'-OCH <sub>3</sub> |                                                                                      |                                                                                      | 56.1                          | 55.9                            |
| 8                   | 3.10 (2H, m, H-8, 8')                                                                | 3.09 (2H, m, H-8, 8')                                                                | 54.3                          | 54.1                            |
| 8'                  |                                                                                      |                                                                                      | 54.3                          | 54.1                            |

  

| Compound 4          |                                                                   |                                                  |                               |                                 |
|---------------------|-------------------------------------------------------------------|--------------------------------------------------|-------------------------------|---------------------------------|
| NO.                 | <sup>1</sup> H NMR data(Exp)                                      | <sup>1</sup> HNMR data(Ref 8)                    | <sup>13</sup> C NMR data(Exp) | <sup>13</sup> C NMR data(Ref 8) |
| 3                   | —                                                                 | —                                                | 147.4                         | 148.1                           |
| 5                   | 7.06 – 6.76 (1H, m)                                               | 6.88-6.76 (1H, m)                                | 111.7                         | 111                             |
| 3'                  | —                                                                 | —                                                | 148.8                         | 149.3                           |
| 4'                  | 5.66 (1H, s)                                                      | 5.70 (1H, s)                                     | 148.2                         | 148.7                           |
| 4                   |                                                                   |                                                  | 146.4                         | 147.2                           |
| 1'                  | —                                                                 | —                                                | 133.9                         | 133.5                           |
| 1                   | —                                                                 | —                                                | 135.5                         | 135.2                           |
| 6'                  | 7.06 – 6.76 (6H, m)                                               | 6.88-6.76 (5H, m)                                | 118.2                         | 118.4                           |
| 5'                  |                                                                   |                                                  | 110                           | 109.2                           |
| 2'                  |                                                                   |                                                  | 106.5                         | 106.7                           |
| 2                   |                                                                   |                                                  | 107.9                         | 108.3                           |
| 6                   |                                                                   |                                                  | 119.3                         | 119.5                           |
| 7                   | 4.66 (2H, d, J = 4.8 Hz )                                         | 4.71 (2H, t, J = 5.6 Hz )                        | 84.9                          | 85.9                            |
| 9'                  |                                                                   |                                                  | 70.9                          | 71.8                            |
| 9                   | 4.16-4.12 (2H, m, H-9a, 7'a); 3.78 (2H, d, J = 4.0 Hz, H-9b, 7'b) | 4.22 (2H, m, H-9a, 7'a); 3.84 (2H, m, H-7'b, 9b) | 71                            | 71.9                            |
| 7'                  |                                                                   |                                                  | 85                            | 85.9                            |
| 3'-OCH <sub>3</sub> | 3.74 (3H, s)                                                      | 3.85 (3H, s)                                     | 55.5                          | 56.1                            |
| 4'-OCH <sub>3</sub> | 3.76 (3H, s)                                                      | 3.87 (3H, s)                                     | 55.5                          | 56                              |
| 8                   | 3.10 – 2.94 (2H, m, H-8, 8')                                      | 3.06 (2H, m, H-8, 8')                            | 53.8                          | 54.4                            |
| 8'                  |                                                                   |                                                  | 53.6                          | 54.3                            |

| Compound 5         |                                         |                                                  |                               |                                 |
|--------------------|-----------------------------------------|--------------------------------------------------|-------------------------------|---------------------------------|
| NO.                | <sup>1</sup> H NMR data(Exp)            | <sup>1</sup> HNMR data(Ref 9)                    | <sup>13</sup> C NMR data(Exp) | <sup>13</sup> C NMR data(Ref 9) |
| 3                  | —                                       | —                                                | 147.5                         | 147.5                           |
| 5                  | 6.95-6.80 (1H, m)                       | 6.94-6.75 (1H, m)                                | 115.1                         | 115.1                           |
| 3'                 | —                                       | —                                                | 147.3                         | 147.4                           |
| 4'                 | —                                       | —                                                | 146.4                         | 146.4                           |
| 4                  | —                                       | —                                                | 145.9                         | 145.9                           |
| 1'                 | —                                       | —                                                | 135.5                         | 135.5                           |
| 1                  | —                                       | —                                                | 132.2                         | 132.1                           |
| 6'                 | 6.95-6.80 (1H, m)                       | 6.94-6.75 (5H, m)                                | 119.3                         | 119.3                           |
| 5'                 | 6.79-6.67 (1H, m)                       |                                                  | 107.9                         | 107.9                           |
| 2'                 | 6.95-6.80 (2H, m)                       |                                                  | 106.5                         | 106.5                           |
| 2                  | —                                       |                                                  | 110.5                         | 110.4                           |
| 6                  | 6.79-6.67 (1H, m)                       |                                                  | 118.6                         | 118.6                           |
| 7                  | 4.63 (2H, dd, J = 9.5, 4.4 Hz, H-7, 9') | 4.72 (2H, dd, J = 9.5, 4.4 Hz, H-7, 9')          | 85.1                          | 85                              |
| 9'                 | —                                       | —                                                | 84.9                          | 84.9                            |
| 9                  | 4.19-4.04 (2H, m, H-9a, 7'a);           | 4.22 (2H, m, H-9a, 7'a); 3.84 (2H, m, H-7'b, 9b) | 71                            | 71                              |
| 7'                 | 3.76-3.71 (2H, m, H-9b, 7'b)            | —                                                | 70.8                          | 70.8                            |
| 3-OCH <sub>3</sub> | 3.77 (3H, s)                            | 3.89 (3H, s)                                     | 55.6                          | 55.6                            |
| 8                  | —                                       | —                                                | 53.5                          | 53.5                            |
| 8'                 | 3.09-2.93 (2H, m)                       | 3.25-2.90 (2H, m)                                | 53.8                          | 53.8                            |

| Compound 6 |                                                                                      |                                                                                    |                               |                                  |
|------------|--------------------------------------------------------------------------------------|------------------------------------------------------------------------------------|-------------------------------|----------------------------------|
| NO.        | <sup>1</sup> H NMR data(Exp)                                                         | <sup>1</sup> HNMR data(Ref 10)                                                     | <sup>13</sup> C NMR data(Exp) | <sup>13</sup> C NMR data(Ref 10) |
| 3          | —                                                                                    | —                                                                                  | 146.4                         | 146.7                            |
| 5          | 6.89-6.79 (1H, m)                                                                    | 6.8 (1H, m)                                                                        | 106.5                         | 106.4                            |
| 3'         | —                                                                                    | —                                                                                  | 146.4                         | 146.7                            |
| 4'         | —                                                                                    | —                                                                                  | 147.4                         | 147.9                            |
| 4          | —                                                                                    | —                                                                                  | 147.4                         | 147.9                            |
| 1'         | —                                                                                    | —                                                                                  | 135.4                         | 134.9                            |
| 1          | —                                                                                    | —                                                                                  | 135.4                         | 134.9                            |
| 6'         | 6.89-6.79 (1H, m)                                                                    | 6.8 (5H, m)                                                                        | 119.3                         | 119.2                            |
| 5'         | 6.89-6.79 (1H, m)                                                                    |                                                                                    | 106.5                         | 106.4                            |
| 2'         | 6.90 (2H, s)                                                                         |                                                                                    | 107.9                         | 108.1                            |
| 2          | —                                                                                    |                                                                                    | 107.9                         | 108.1                            |
| 6          | 6.89-6.79 (1H, m)                                                                    |                                                                                    | 119.3                         | 119.2                            |
| 7          | 4.64 (2H, d, J = 3.6 Hz, H-7, 9')                                                    | 4.7 (2H, d, J = 4.1 Hz, H-7, 9')                                                   | 84.8                          | 85.7                             |
| 9'         | —                                                                                    | —                                                                                  | 84.8                          | 85.7                             |
| 9          | 4.11 (2H, dd, J = 6.7, 8.6 Hz, H-9a, 7'a); 3.76 (2H, dd, J = 2.9, 9.0 Hz, H-9b, 7'b) | 4.2 (2H, dd, J = 7.0, 9.3 Hz, H-9a, 7'a); 3.8 (2H, dd, J = 3.5, 9.3 Hz, H-9b, 7'b) | 70.9                          | 71.6                             |
| 7'         | —                                                                                    | —                                                                                  | 70.9                          | 71.6                             |
| 8          | —                                                                                    | —                                                                                  | 53.7                          | 54.2                             |
| 8'         | 3.06-2.91(2H, m)                                                                     | 3.1(2H, m)                                                                         | 53.7                          | 54.2                             |
| 10         | —                                                                                    | —                                                                                  | 100.8                         | 101.1                            |
| 10'        | 5.99 (4H, s)                                                                         | 5.9 (4H, s)                                                                        | 100.8                         | 101.1                            |

| Compound7 |                                                                        |                                                                    |                               |                                  |
|-----------|------------------------------------------------------------------------|--------------------------------------------------------------------|-------------------------------|----------------------------------|
| NO.       | <sup>1</sup> H NMR data(Exp)                                           | <sup>1</sup> HNMR data(Ref 11)                                     | <sup>13</sup> C NMR data(Exp) | <sup>13</sup> C NMR data(Ref 11) |
| 3         | —                                                                      | —                                                                  | 147.5                         | 147.5                            |
| 5         | 6.94-6.82 (1H, m)                                                      | 6.8-7.1 (1H, m)                                                    | 106.8                         | 106.8                            |
| 3'        | —                                                                      | —                                                                  | 147.3                         | 147.3                            |
| 4'        | —                                                                      | —                                                                  | 146.3                         | 146.3                            |
| 4         | —                                                                      | —                                                                  | 146.5                         | 146.5                            |
| 1'        | —                                                                      | —                                                                  | 136.2                         | 136.3                            |
| 1         | —                                                                      | —                                                                  | 137.3                         | 137.3                            |
| 6'        | 6.94-6.82 (2H, m)                                                      | 6.8-7.1 (5H, m)                                                    | 119.1                         | 119.1                            |
| 5'        |                                                                        |                                                                    | 106.2                         | 106.2                            |
| 2'        |                                                                        |                                                                    | 107.7                         | 107.7                            |
| 2         |                                                                        |                                                                    | 108                           | 108                              |
| 6         | 6.94-6.82 (1H, m))                                                     | 4.79 (1H, d, J = 6.6 Hz, H-7); 4.71 (1H, d, J = 6.6 Hz, H-9')      | 119.4                         | 119.5                            |
| 7         | 4.78 (2H, dd, J = 27.9, 6.6 Hz)                                        |                                                                    | 82.6                          | 82.5                             |
| 9'        | —                                                                      |                                                                    | 71.4                          | 71.4                             |
| 9         | 5.43 (1H, d, J = 4.6 Hz)                                               | 5.40 (1H, s)                                                       | 100.9                         | 100.9                            |
| 7'        | 4.12 (1H, dd, J = 8.2, 6.4 Hz, H-7'a), 3.94 (1H, d, J = 8.3 Hz, H-7'b) | 4.09 (1H, dd, J = 9, 6 Hz, H-7'a), 3.91 (1H, d, J = 6.6 Hz, H-7'b) | 86                            | 86                               |
| 8         | 2.69 (1H, m, H-8)                                                      | 2.66 (1H, m, H-8)                                                  | 62.1                          | 62.2                             |
| 8'        | 3.30-2.97(1H, m, H-8')                                                 | 2.98 (1H, m, H-8')                                                 | 53.4                          | 53.4                             |

  

| Compound8 |                                                                             |                                                                             |                               |                                  |
|-----------|-----------------------------------------------------------------------------|-----------------------------------------------------------------------------|-------------------------------|----------------------------------|
| NO.       | <sup>1</sup> H NMR data(Exp)                                                | <sup>1</sup> HNMR data(Ref 12)                                              | <sup>13</sup> C NMR data(Exp) | <sup>13</sup> C NMR data(Ref 12) |
| 3         | —                                                                           | —                                                                           | 147.7                         | 148.4                            |
| 5         | 6.96-6.82 (1H, m)                                                           | 6.76-6.87 (1H, m)                                                           | 106.6                         | 106                              |
| 3'        | —                                                                           | —                                                                           | 147.5                         | 147.3                            |
| 4'        | —                                                                           | —                                                                           | 146.8                         | 146.8                            |
| 4         | —                                                                           | —                                                                           | 147.4                         | 147.4                            |
| 1'        | —                                                                           | —                                                                           | 133.5                         | 133.1                            |
| 1         | —                                                                           | —                                                                           | 134.2                         | 134.4                            |
| 6'        | 6.96-6.82 (3H, m)                                                           | 6.76-6.87 (5H, m)                                                           | 119.5                         | 118.8                            |
| 5'        |                                                                             |                                                                             | 106.4                         | 105.7                            |
| 2'        |                                                                             |                                                                             | 108                           | 108.4                            |
| 2         |                                                                             |                                                                             | 108.1                         | 108.6                            |
| 6         | 6.96-6.82 (1H, m)                                                           | 5.32 (1H, d, J = 3.6 Hz)                                                    | 120.1                         | 119                              |
| 7         | 5.44 (1H, d, J = 3.6 Hz)                                                    |                                                                             | 84.3                          | 84.4                             |
| 9'        | 5.14 (1H, d, J = 3.8 Hz)                                                    |                                                                             | 82.7                          | 83.4                             |
| 9         | —                                                                           | 5.30 (1H, d, J = 3.6 Hz)                                                    | 176.8                         | 176.6                            |
| 7'        | 4.17 (1H, dd, J = 9.2, 7.4 Hz, H-7'a), 3.96 (1H, d, J = 9.4, 4.5 Hz, H-7'b) | 4.32 (1H, dd, J = 9.2, 6.8 Hz, H-7'a), 4.02 (1H, d, J = 9.4, 4.8 Hz, H-7'b) | 72.2                          | 72.7                             |
| 8         | 3.78 (1H, dd, J = 9.3, 3.8 Hz)                                              | 3.42 (1H, dd, J = 9.2, 3.6 Hz)                                              | 52.3                          | 53.3                             |
| 8'        | 3.31-3.24(1H, m)                                                            | 3.2(1H, m)                                                                  | 48.6                          | 50                               |
| 10        | 6.03 (4H, d, J = 8.0 Hz, H-10, 10')                                         | 5.98 (1H, s); 5.96(1H, s)                                                   | 101.2                         | 101.5                            |
| 10'       |                                                                             |                                                                             | 101                           | 101.2                            |

| Compound 9     |                                                                                                         |                                                                                              |                               |                                  |
|----------------|---------------------------------------------------------------------------------------------------------|----------------------------------------------------------------------------------------------|-------------------------------|----------------------------------|
| NO.            | <sup>1</sup> H NMR data(Exp)                                                                            | <sup>1</sup> HNMR data(Ref 13)                                                               | <sup>13</sup> C NMR data(Exp) | <sup>13</sup> C NMR data(Ref 13) |
| 3              |                                                                                                         |                                                                                              | 147.5                         | 148.3                            |
| 5              | 6.87 (1H, s)                                                                                            | 6.82 (1H, s)                                                                                 | 108                           | 108.4                            |
| 4              | —                                                                                                       | —                                                                                            | 146.8                         | 147.8                            |
| 1              |                                                                                                         |                                                                                              | 134.1                         | 132.8                            |
| 2              | 6.96 (1H, s)                                                                                            | 6.86 (1H, s)                                                                                 | 106.5                         | 106.4                            |
| 6              | 6.87 (1H, s)                                                                                            | 6.81 (1H, s)                                                                                 | 119.5                         | 119.6                            |
| 7              | 4.69 (1H, d, J = 6.3 Hz)                                                                                | 4.62 (1H, d, J = 7.0 Hz)                                                                     | 85.3                          | 86.1                             |
| 9 <sup>a</sup> | 4.48 (1H, dd, J = 9.4, 6.9 Hz, H-9 <sup>a</sup> );<br>4.18 (1H, t, J = 8.6 Hz, H-9 <sup>b</sup> )       | 4.51 (1H, m, H-9 <sup>a</sup> ); 4.21 (1H, dd, J = 3.5 Hz,<br>J = 9.5 Hz, H-9 <sup>b</sup> ) | 70.1                          | 70.1                             |
| 9              |                                                                                                         |                                                                                              | 178.5                         | 178.1                            |
| 7 <sup>a</sup> | 4.34 (1H, dd, J = 9.5, 1.8 Hz, H-7 <sup>a</sup> );<br>3.95 (1H, dd, J = 9.0, 3.2 Hz, H-7 <sup>b</sup> ) | 4.38 (1H, d, J = 7.0 Hz, H-7 <sup>a</sup> ), 4.35 (1H, m,<br>H-7 <sup>b</sup> )              | 69.5                          | 69.8                             |
| 8              | 3.09 (1H, dtd, J = 8.6, 6.8, 1.8 Hz, H-8)                                                               | 3.10 (1H, m)                                                                                 | 45.8                          | 46                               |
| 8 <sup>a</sup> | 3.57 (1H, td, J = 8.7, 3.2 Hz)                                                                          | 3.45 (1H, td, J = 9.5, 3.5Hz)                                                                | 47.6                          | 48.4                             |
| 10             | 6.00 (2H, s)                                                                                            | 5.99 (2H, s)                                                                                 | 101                           | 101.3                            |

| Compound10                  |                                                                   |                                                                   |                               |                                  |
|-----------------------------|-------------------------------------------------------------------|-------------------------------------------------------------------|-------------------------------|----------------------------------|
| NO.                         | <sup>1</sup> H NMR data(Exp)                                      | <sup>1</sup> HNMR data(Ref 14)                                    | <sup>13</sup> C NMR data(Exp) | <sup>13</sup> C NMR data(Ref 14) |
| 1                           | —                                                                 | —                                                                 | 178.3                         | 178                              |
| 2                           | 2.70 (1H, d, J = 5.0 Hz)                                          | 2.70 (1H, d, J = 5.0 Hz)                                          | 45.6                          | 46.1                             |
| 3                           | 2.57 – 2.36 (1H, m)                                               | 2.57 – 2.36 (1H, m)                                               | 40.8                          | 40.7                             |
| 4                           | 4.10 (1H, d, J = 7.2 Hz, H-4a), 3.88 (1H,<br>d, J = 7.2 Hz, H-4b) | 4.10 (1H, d, J = 7.2 Hz, H-4a), 3.88 (1H,<br>d, J = 7.2 Hz, H-4b) | 70.7                          | 70.7                             |
| 5                           | 2.57 – 2.36 (2H, m)                                               | 2.57 – 2.36 (2H, m)                                               | 33.7                          | 34.1                             |
| 1'                          | —                                                                 | —                                                                 | 131.2                         | 130.3                            |
| 2'                          | 6.95 – 6.39 (1H, m)                                               | 6.95 – 6.39 (1H, m)                                               | 113.2                         | 112.6                            |
| 3'                          | —                                                                 | —                                                                 | 148.7                         | 148.9                            |
| 4'                          |                                                                   |                                                                   | 147.5                         | 147.7                            |
| 5'                          | 6.95 – 6.39 (1H, m)                                               | 6.95 – 6.39 (1H, m)                                               | 111.9                         | 112                              |
| 6'                          | 6.95 – 6.39 (1H, m)                                               | 6.95 – 6.39 (1H, m)                                               | 121.2                         | 121.1                            |
| 1''                         | —                                                                 | —                                                                 | 130.6                         | 130                              |
| 2''                         | 6.95 – 6.39 (1H, m)                                               | 6.95 – 6.39 (1H, m)                                               | 112.5                         | 112.6                            |
| 3''                         | —                                                                 | —                                                                 | 148.6                         | 148.9                            |
| 4''                         |                                                                   |                                                                   | 147.4                         | 147.7                            |
| 5''                         | 6.95 – 6.39 (1H, m)                                               | 6.95 – 6.39 (1H, m)                                               | 111.8                         | 111.4                            |
| 6''                         | 6.95 – 6.39 (1H, m)                                               | 6.95 – 6.39 (1H, m)                                               | 120.4                         | 120.3                            |
| 7                           | 2.82 (2H, dt, J = 20.0, 11.3 Hz)                                  | 2.82 (2H, dt, J = 20.0, 11.3 Hz)                                  | 36.9                          | 37.97                            |
| (3', 4', 3'',<br>4'''-OCH3) | 3.71 (12H, s)                                                     | 3.71 (12H, s)                                                     | 55.4                          | 55.5                             |

| Compound11        |                              |                                |                               |                                  |
|-------------------|------------------------------|--------------------------------|-------------------------------|----------------------------------|
| NO.               | <sup>1</sup> H NMR data(Exp) | <sup>1</sup> HNMR data(Ref 15) | <sup>13</sup> C NMR data(Exp) | <sup>13</sup> C NMR data(Ref 15) |
| 1                 | —                            | —                              | 135.3                         | 134.3                            |
| 2                 | 6.84 – 6.53 (1H, m)          | 6.78 – 6.60 (1H, m)            | 107.7                         | 108.1                            |
| 3                 | —                            | —                              | 147                           | 147.6                            |
| 4                 | —                            | —                              | 145                           | 145.8                            |
| 5                 | 6.84 – 6.53 (1H, m)          | 6.78 – 6.60 (1H, m)            | 109.2                         | 109.3                            |
| 6                 | 6.84 – 6.53 (1H, m)          | 6.78 – 6.60 (1H, m)            | 121.7                         | 121.8                            |
| 7                 | 2.60–2.42 (1H, m)            | 2.65 (1H, m)                   | 34                            | 35.9                             |
| 8                 | 1.92 – 1.72 (1H, m)          | 1.81 (1H, m)                   | 55.5                          | 55.9                             |
| 9                 | 3.44 – 3.36 (2H, m)          | 3.51 (2H, m)                   | 60.2                          | 60.6                             |
| 1'                | —                            | —                              | 133.9                         | 133                              |
| 2'                | 6.84 – 6.53 (1H, m)          | 6.78 – 6.60 (1H, m)            | 111.7                         | 111.1                            |
| 3'                | —                            | —                              | 148.5                         | 148.9                            |
| 4'                |                              |                                | 146.8                         | 147.4                            |
| 5'                | 6.84 – 6.53 (1H, m)          | 6.78 – 6.60 (1H, m)            | 112.6                         | 112                              |
| 6'                | 6.84 – 6.53 (1H, m)          | 6.78 – 6.60 (1H, m)            | 120.8                         | 121                              |
| 7'                | 2.60–2.42 (1H, m)            | 2.65 (1H, m)                   | 33.9                          | 35.8                             |
| 8'                | 1.92 – 1.72 (1H, m)          | 1.81 (1H, m)                   | 42.4                          | 44.1                             |
| 9'                | 3.44 – 3.36 (2H, m)          | 3.51 (2H, m)                   | 60.1                          | 60.5                             |
| (3', 4'-<br>OCH3) | 3.71 (3H, s), 3.68 (3H, s)   | 3.84 (3H, s), 3.81 (3H, s)     | 55.5                          | 55.8                             |

| Compound12 |                                 |                                |                               |                                  |
|------------|---------------------------------|--------------------------------|-------------------------------|----------------------------------|
| NO.        | <sup>1</sup> H NMR data(Exp)    | <sup>1</sup> HNMR data(Ref 16) | <sup>13</sup> C NMR data(Exp) | <sup>13</sup> C NMR data(Ref 16) |
| 1          | —                               | —                              | 131.7                         | 131.8                            |
| 2          | 6.92 (1H, s)                    | 6.93 (1H, s)                   | 110.5                         | 110.5                            |
| 3          | —                               | —                              | 147.6                         | 147.7                            |
| 4          | —                               | —                              | 146.6                         | 146.7                            |
| 5          | 6.77 (1H, s)                    | 6.76 (1H, s)                   | 115.4                         | 115.5                            |
| 6          | 6.75 (1H, s)                    | 6.76 (1H, s)                   | 118.7                         | 118.8                            |
| 7          | 5.56 (1H, d, J = 6.7 Hz)        | 5.56 (1H, d, J = 6.6 Hz)       | 88.1                          | 88.3                             |
| 8          | 3.53 (1H, dd, J = 12.1, 6.0 Hz) | 3.54 (1H, m)                   | 52.4                          | 52.5                             |
| 9          | 3.73 – 3.62 (2H, m)             | 3.67 (2H, m)                   | 62.7                          | 62.8                             |
| 1'         | —                               | —                              | 127.7                         | 127.8                            |
| 2'         | 7.32 (1H, s)                    | 7.32 (1H, s)                   | 112.6                         | 112.6                            |
| 3'         | —                               | —                              | 144.1                         | 144.2                            |
| 4'         | —                               | —                              | 150.7                         | 150.8                            |
| 5'         | —                               | —                              | 130.1                         | 130.3                            |
| 6'         | 7.32 (1H, s)                    | 7.32 (1H, s)                   | 118.9                         | 118.8                            |
| 7'         | 7.65 (1H, d, J = 15.7 Hz)       | 7.65 (1H, d, J = 16.0 Hz)      | 153.9                         | 154.2                            |
| 8'         | 6.80 (1H, d, J = 7.8 Hz)        | 6.80 (1H, d, J = 7.8 Hz)       | 126.1                         | 126.2                            |
| 9'         | 9.60 (1H, d, J = 7.8 Hz)        | 9.60 (1H, d, J = 7.8 Hz)       | 194                           | 194.2                            |
| (3-OCH3)   | 3.75 (3H, s)                    | 3.75 (3H, s)                   | 55.7                          | 55.7                             |
| (3'-OCH3)  | 3.84 (3H, s)                    | 3.84 (3H, s)                   | 55.8                          | 55.9                             |

| Compound13      |                                                                       |                                |                               |                                  |
|-----------------|-----------------------------------------------------------------------|--------------------------------|-------------------------------|----------------------------------|
| NO.             | <sup>1</sup> H NMR data(Exp)                                          | <sup>1</sup> HNMR data(Ref 17) | <sup>13</sup> C NMR data(Exp) | <sup>13</sup> C NMR data(Ref 17) |
| 1               | —                                                                     | —                              | 132.4                         | 132.1                            |
| 2               | 6.60 (1H, s)                                                          | 6.59 (1H, s)                   | 103.7                         | 103                              |
| 3               | —                                                                     | —                              | 147.9                         | 147.4                            |
| 4               | —                                                                     | —                              | 134.9                         | 134.2                            |
| 5               | —                                                                     | —                              | 147.9                         | 147.4                            |
| 6               | 6.60 (1H, s)                                                          | 6.59 (1H, s)                   | 103.7                         | 103                              |
| 7               | 4.64 (1H, d, J = 3.7 Hz)                                              | 4.76 (1H, d, J = 3.4 Hz)       | 85.1                          | 86                               |
| 8               | 3.11 (1H, m)                                                          | 3.11 (1H, m)                   | 53.6                          | 54.5                             |
| 9               | 4.21 – 4.09 (2H, m)                                                   | 4.12 (2H, m)                   | 71.1                          | 71.8                             |
| 1'              | —                                                                     | —                              | 136.8                         | 137.9                            |
| 2'              | 6.65 (1H, s)                                                          | 6.64 (1H, s)                   | 103.7                         | 103                              |
| 3'              | —                                                                     | —                              | 152.6                         | 153.6                            |
| 4'              | —                                                                     | —                              | 134.9                         | 134.6                            |
| 5'              | —                                                                     | —                              | 152.6                         | 153.6                            |
| 6'              | 6.65 (1H, s)                                                          | 6.64 (1H, s)                   | 103.7                         | 103                              |
| 7'              | 4.21 – 4.09 (1H, m, H-7'a);<br>4.01 (1H, dd, J = 10.0, 5.8 Hz, H-7'b) | 4.12 (2H, m)                   | 71.2                          | 71.8                             |
| 8'              | 3.11 (1H, m)                                                          | 3.11 (1H, m)                   | 53.7                          | 54.5                             |
| 9'              | 4.64 (1H, d, J = 3.7 Hz)                                              | 4.76 (1H, d, J = 3.4 Hz)       | 85.3                          | 86                               |
| 1''             | —                                                                     | —                              | 131.4                         | 130.6                            |
| 2''             | 6.60 (1H, s)                                                          | 6.59 (1H, s)                   | 104.3                         | 103                              |
| 3''             | —                                                                     | —                              | 147.4                         | 147.2                            |
| 4''             | —                                                                     | —                              | 134.3                         | 134.5                            |
| 5''             | —                                                                     | —                              | 147.4                         | 147.2                            |
| 6''             | 6.60 (1H, s)                                                          | 6.59 (1H, s)                   | 103.3                         | 102.8                            |
| 7''             | 5.17 – 5.09 (1H, m)                                                   | 4.98 (1H, m)                   | 72.4                          | 72.2                             |
| 8''             | 4.81 (1H, dd, J = 7.8, 4.6 Hz)                                        | 4.81 (1H, dd, J = 7.8, 4.6 Hz) | 86.2                          | 86.1                             |
| 9''             | 3.93 (1H, m)                                                          | 3.93 (1H, m)                   | 59.9                          | 60.6                             |
| (3, 5-OCH3)     | 3.77 (6H, s)                                                          | 3.87 (6H, s)                   | 56                            | 56.5                             |
| (3', 5'-OCH3)   | 3.75 (6H, s)                                                          | 3.89 (6H, s)                   | 56                            | 56.5                             |
| (3'', 5''-OCH3) | 3.73 (6H, s)                                                          | 3.90 (6H, s)                   | 55.9                          | 56.4                             |

| Compound14      |                                                                      |                                |                               |                                  |
|-----------------|----------------------------------------------------------------------|--------------------------------|-------------------------------|----------------------------------|
| NO.             | <sup>1</sup> H NMR data(Exp)                                         | <sup>1</sup> HNMR data(Ref 18) | <sup>13</sup> C NMR data(Exp) | <sup>13</sup> C NMR data(Ref 18) |
| 1               | —                                                                    | —                              | 134.8                         | 134.8                            |
| 2               | 6.64 (1H, s)                                                         | 6.69 (1H, s)                   | 103.3                         | 103.3                            |
| 3               | —                                                                    | —                              | 152.6                         | 152.6                            |
| 4               | —                                                                    | —                              | 136.8                         | 136.8                            |
| 5               | —                                                                    | —                              | 152.6                         | 152.6                            |
| 6               | 6.64 (1H, s)                                                         | 6.69 (1H, s)                   | 103.3                         | 103.3                            |
| 7               | 4.67 (1H, d, J = 3.4 Hz)                                             | 4.67 (1H, d, J = 3.7 Hz)       | 85.1                          | 85.1                             |
| 8               | 3.12 – 2.99 (1H, m)                                                  | 3.06 (1H, m)                   | 53.6                          | 53.7                             |
| 9               | 4.03 (2H, d, J = 3.0 Hz, H-9a, 7'a), 3.85 – 3.79 (2H, m, H-9b, 7'b)  | 3.70 (2H, m)                   | 71.3                          | 71.3                             |
| 1'              | —                                                                    | —                              | 134.8                         | 134.8                            |
| 2'              | 6.64 (1H, s)                                                         | 6.69 (1H, s)                   | 103.3                         | 103.3                            |
| 3'              | —                                                                    | —                              | 152.6                         | 152.6                            |
| 4'              | —                                                                    | —                              | 136.8                         | 136.8                            |
| 5'              | —                                                                    | —                              | 152.6                         | 152.6                            |
| 6'              | 6.64 (1H, s)                                                         | 6.69 (1H, s)                   | 103.3                         | 103.3                            |
| 7'              | 4.03 (2H, d, J = 3.0 Hz, H-9a, 7'a), 3.85 – 3.79 (2H, m, H-9b, 7'b), | 3.70 (2H, m)                   | 71.3                          | 71.3                             |
| 8'              | 3.12 – 2.99 (1H, m)                                                  | 3.06 (1H, m)                   | 53.6                          | 53.7                             |
| 9'              | 4.67 (1H, d, J = 3.4 Hz)                                             | 4.67 (1H, d, J = 3.7 Hz)       | 85.1                          | 85.1                             |
| 1''             | —                                                                    | —                              | 133.3                         | 133.3                            |
| 2''             | 6.76 – 6.67 (1H, m)                                                  | 6.72 (1H, m)                   | 119.4                         | 119.4                            |
| 3''             | 6.76 – 6.67 (1H, m)                                                  | 6.72 (1H, m)                   | 114.6                         | 114.6                            |
| 4''             | —                                                                    | —                              | 145.3                         | 145.3                            |
| 5''             | —                                                                    | —                              | 146.9                         | 147                              |
| 6''             | 6.92 (1H, s)                                                         | 6.91 (1H, s)                   | 111                           | 110.9                            |
| 7''             | 5.10 (1H, d, J = 2.5 Hz)                                             | 4.79 (1H, dd, J = 5.0, 3.2 Hz) | 72.1                          | 72.1                             |
| 8''             | 4.23 – 4.16 (1H, m)                                                  | 4.2 (1H, m)                    | 86.1                          | 86.2                             |
| 9''             | 4.14 – 4.07 (2H, m)                                                  | 4.10 (2H, m)                   | 59.8                          | 60                               |
| 1'''            | —                                                                    | —                              | 133.3                         | 133.3                            |
| 2'''            | 6.76 – 6.67 (1H, m)                                                  | 6.72 (1H, m)                   | 119.4                         | 119.4                            |
| 3'''            | 6.76 – 6.67 (1H, m)                                                  | 6.72 (1H, m)                   | 114.6                         | 114.6                            |
| 4'''            | —                                                                    | —                              | 145.3                         | 145.3                            |
| 5'''            | —                                                                    | —                              | 146.9                         | 147                              |
| 6'''            | 6.92 (1H, s)                                                         | 6.91 (1H, s)                   | 111                           | 110.9                            |
| 7'''            | 5.10 (1H, d, J = 2.5 Hz)                                             | 4.79 (1H, dd, J = 5.0, 3.2 Hz) | 72.1                          | 72.1                             |
| 8'''            | 4.23 – 4.16 (1H, m)                                                  | 4.2 (1H, m)                    | 86.1                          | 86.2                             |
| 9'''            | 4.14 – 4.07 2H, m)                                                   | 4.10 (2H, m)                   | 59.8                          | 60                               |
| (3, 5-OCH3)     | 3.75 (18H, d, J = 8.4 Hz, 3, 3', 3'', 5, 5', 5''-OCH3)               | 3.76 (12H, s)                  | 56                            | 56                               |
| (3', 5'-OCH3)   |                                                                      |                                | 56                            | 56                               |
| (3'', 5''-OCH3) |                                                                      |                                | 55.5                          | 55.5                             |
